# Supplementary material for: Rationalization of chirality induction and inversion in a zinc trisporphyrinate by a chiral monoalcohol
Source: Royal Society of Chemistry journal article supplement (doi:10.1039/c6dt00570e), 2016-01-01
Supplement: c6dt00570e1.pdf [file c6dt00570e1.pdf]

## Rationalization of the chirality induction and inversion in a zinc trisporphyrinate by a chiral monoalcohol

Li Li,<sup>a</sup> Chuanjiang Hu,<sup>\*a</sup> Bo Shi<sup>b</sup> and Yong Wang<sup>\*a</sup>

|                                                                                                                               |     |
|-------------------------------------------------------------------------------------------------------------------------------|-----|
| CD titration spectra of [Zn <sub>3</sub> -1] by R-1-phenylethylalcohol (Figures S1).....                                      | S3  |
| NMR spectra (Figures S2 to S5) .....                                                                                          | S4  |
| UV-vis spectra change of [Zn <sub>2</sub> Ni-1] by S-1-phenylethylalcohol (Figure S6) .....                                   | S8  |
| UV-vis spectra change of [ZnNi <sub>2</sub> -1] by S-1-phenylethylalcohol (Figure S7).....                                    | S9  |
| Job's plot for complexation of [Zn <sub>3</sub> -1] and S-PEO (Figure S8).....                                                | S10 |
| The fitting graphs for [Zn <sub>3</sub> -1] by UV-vis spectra (Figure S9).....                                                | S11 |
| The fitting graphs for [Zn <sub>2</sub> Ni-1] by UV-vis spectra (Figure S10).....                                             | S12 |
| The fitting graphs for [ZnNi <sub>2</sub> -1] by UV-vis spectra (Figure S11) .....                                            | S13 |
| The fitting graphs for [Zn <sub>3</sub> -1] by CD spectra (Figure S12) .....                                                  | S14 |
| The fitting graphs for [Zn <sub>2</sub> Ni-1] by CD spectra (Figure S13) .....                                                | S15 |
| The fitting graphs for [ZnNi <sub>2</sub> -1] by CD spectra (Figure S14) .....                                                | S16 |
| ORTEP view for [Zn <sub>3</sub> -1]·(S-PEO) <sub>2</sub> ·H <sub>2</sub> O (mol B) (Figure S15) .....                         | S17 |
| Hydrogen bonds and π-π interactions in [Zn <sub>3</sub> -1]·(S-PEO) <sub>2</sub> ·H <sub>2</sub> O (mol B) (Figure S16) ..... | S18 |
| Comparison of <b>1</b> and [Zn <sub>3</sub> -1] in UV-vis spectra (Figure S17) .....                                          | S19 |
| Comparison of <b>1</b> and [Zn <sub>3</sub> -1] in <sup>1</sup> H NMR (Figure S18) .....                                      | S20 |
| Comparison of <b>1</b> and [Zn <sub>3</sub> -1] in IR (Figure S19) .....                                                      | S21 |

|                                                                                                                            |          |
|----------------------------------------------------------------------------------------------------------------------------|----------|
| Relative energies of DFT-optimized conformer A1 and conformer B1 of [Zn <sub>3</sub> -1]·(S-PEO) (Figure S20)              | .....S22 |
| Relative energies of DFT-optimized conformer A2 and conformer B2 of [Zn <sub>3</sub> -1]·(S-PEO) <sub>2</sub> (Figure S21) | .....S23 |
| Calculated CD spectrum for the conformer A1 (Figure S22)                                                                   | .....S24 |
| Calculated CD spectrum for the conformer A2 (Figure S23)                                                                   | .....S25 |
| Calculated Binding Constants. (Table S1)                                                                                   | .....S26 |
| Bond lengths and angles for hydrogen bonds (Table S2)                                                                      | .....S27 |
| Selected bond distances for [Zn <sub>3</sub> -1]·(S-PEO) <sub>2</sub> ·H <sub>2</sub> O (Table S3)                         | .....S28 |
| Cartesian coordinates for Geometry Optimized Conformers A1, B1, A2, B2                                                     | .....S29 |

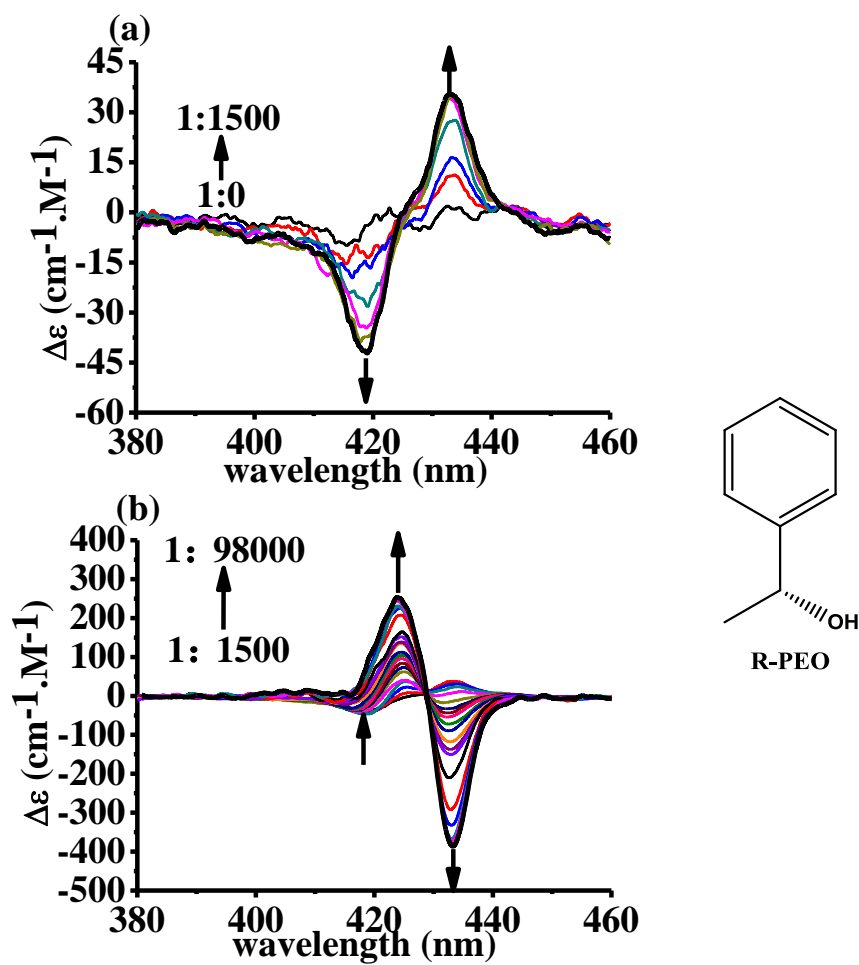

**Figure S1.** CD titration of [Zn<sub>3</sub>-1] ( $1.08 \times 10^{-6}$  M) by R-1-phenylethylalcohol in methylene chloride at 295 K. The host to guest ratio is a) from 1:0 to 1:1500; b) from 1:1500 to 1:98000.

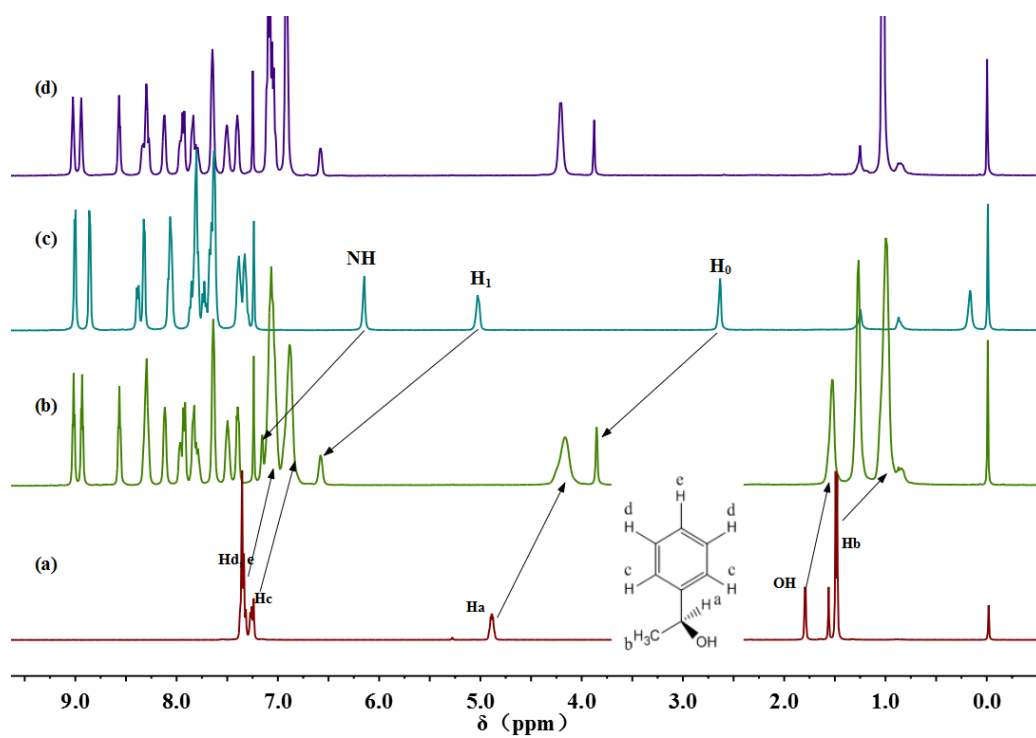

**Figure S2.**  $^1\text{H}$  NMR spectra in  $\text{CDCl}_3$  (at 295 K) of (a) S-PEO, (b) the mixture of [Zn<sub>3</sub>-1] and S-PEO (12 eq.), (c) [Zn<sub>3</sub>-1] ( $4.23 \times 10^{-3}$  M), (d) Addition of  $\text{D}_2\text{O}$  into (b). Inset shows the proton numbering scheme of S-PEO. The arrows show the shift of the relevant protons.

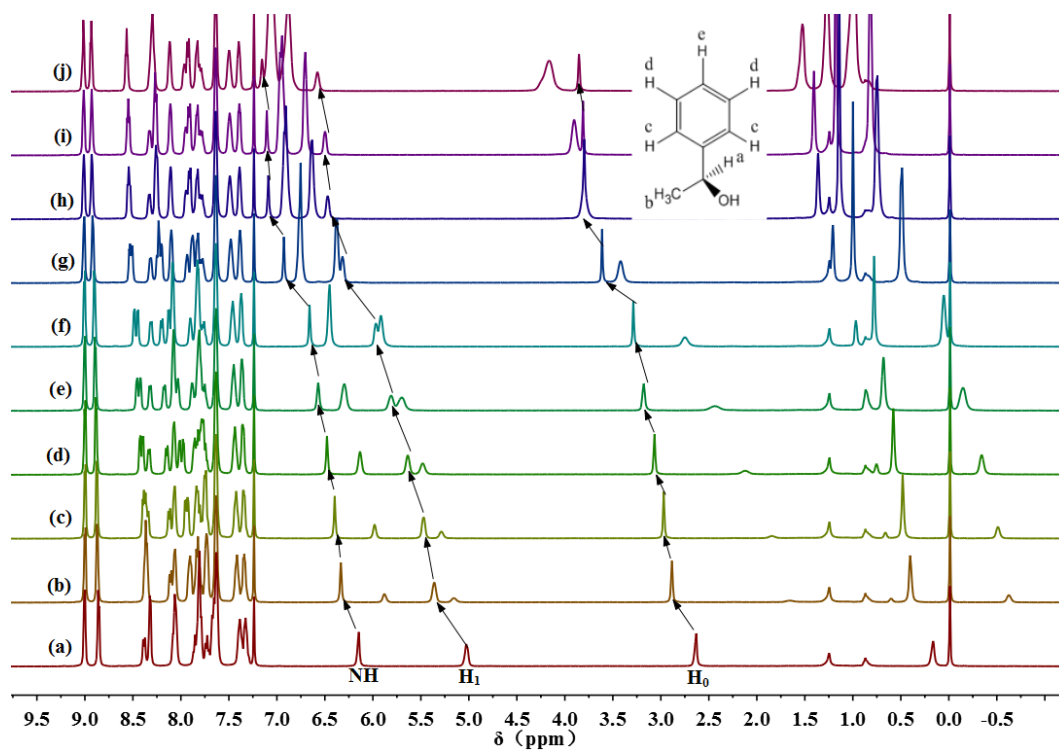

**Figure S3.**  $^1\text{H}$  NMR spectral changes of of  $[\text{Zn}_3\text{-1}]$  ( $4.23 \times 10^{-3}$  M) upon addition of S-1-phenylethylalcohol in  $\text{CDCl}_3$  at 295 K as the host-guest molar ratio: (a) 1:0, (b) 1:0.42, (c) 1:0.60, (d) 1:1.05, (e) 1:1.65, (f) 1:2.50, (g) 1:4.50, (h) 1:6.00, (i) 1:6.90, (j) 1:12.00. Insert shows the proton numbering scheme of S-1-phenylethylalcohol.

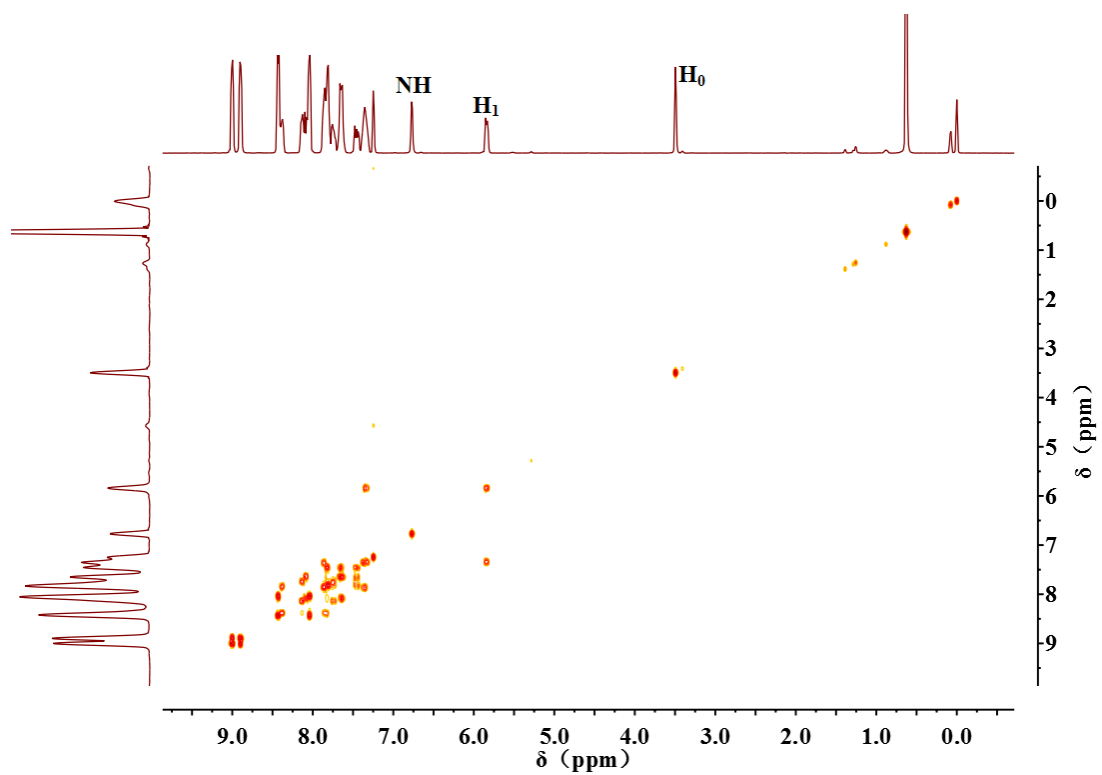

**Figure S4.**  $^1\text{H}$ - $^1\text{H}$  gCOSY spectrum of  $[\text{Zn}_3\text{-1}]$  ( $4.23 \times 10^{-3}$  M) in  $\text{CDCl}_3$  at 295 K. Inset shows the proton numbering scheme of  $[\text{Zn}_3\text{-1}]$ .

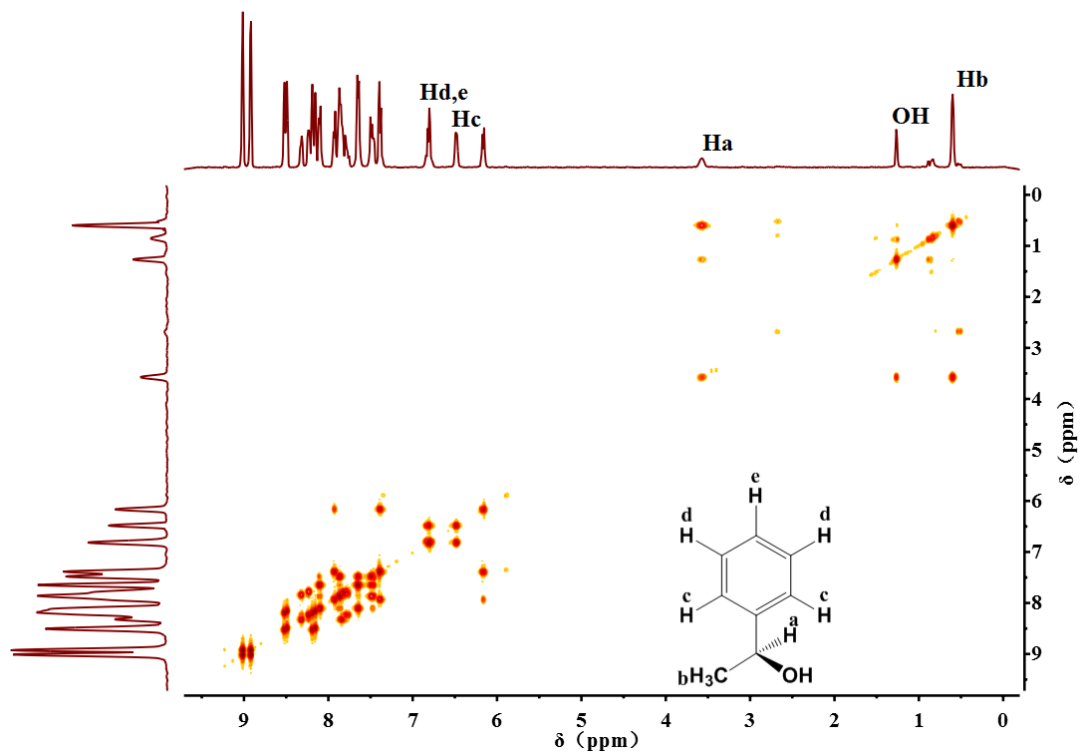

**Figure S5.**  $^1\text{H}$ - $^1\text{H}$  gCOSY spectrum of the mixture of [Zn<sub>3</sub>-1] ( $4.06 \times 10^{-3}$  M) and S-PEO (6.0 eq.) in CDCl<sub>3</sub> at 295 K. Inset shows the proton numbering scheme of S-PEO.

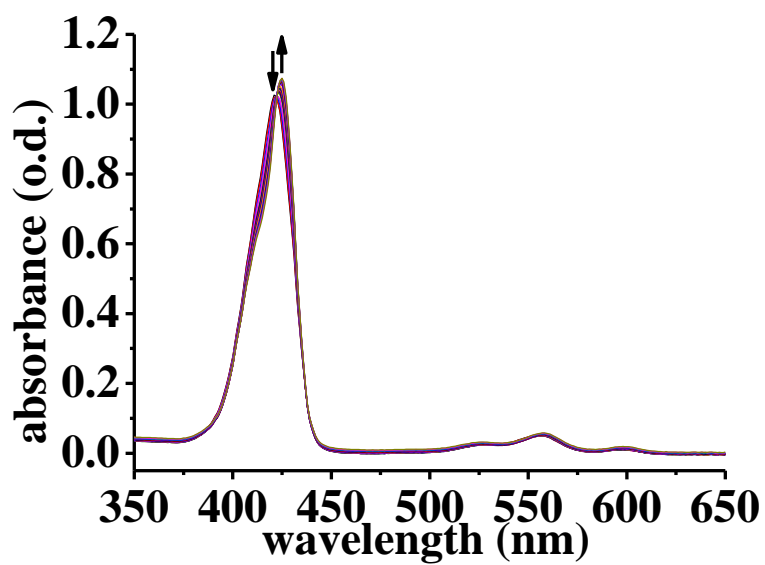

**Figure S6.** UV-vis spectral change of [Zn<sub>2</sub>Ni-1] ( $1.17 \times 10^{-6}$  M) upon addition of S-1-phenylethylalcohol as the host-guest molar ratio changes from 1:0 to 1: 18000.



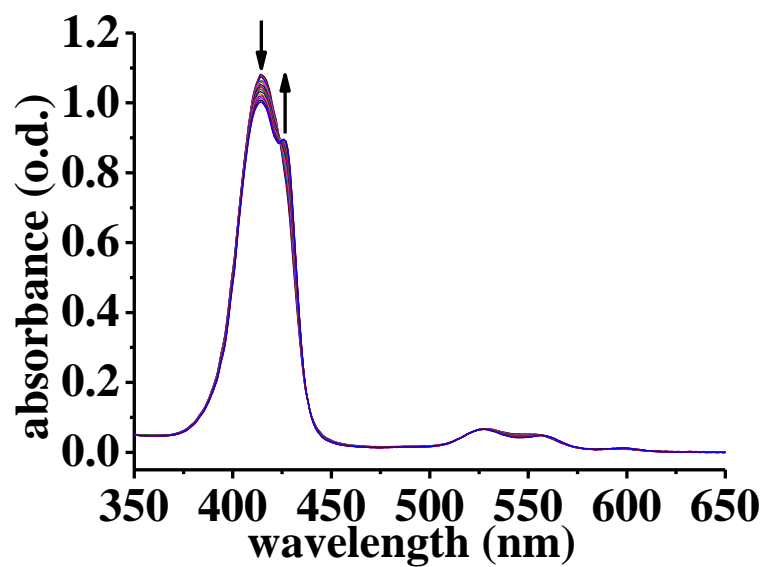

**Figure S7.** UV-vis spectral change of [ZnNi<sub>2</sub>-1] ( $1.16 \times 10^{-6}$  M) upon addition of S-1-phenylethylalcohol as the host-guest molar ratio changes from 1:0 to 1: 18000.

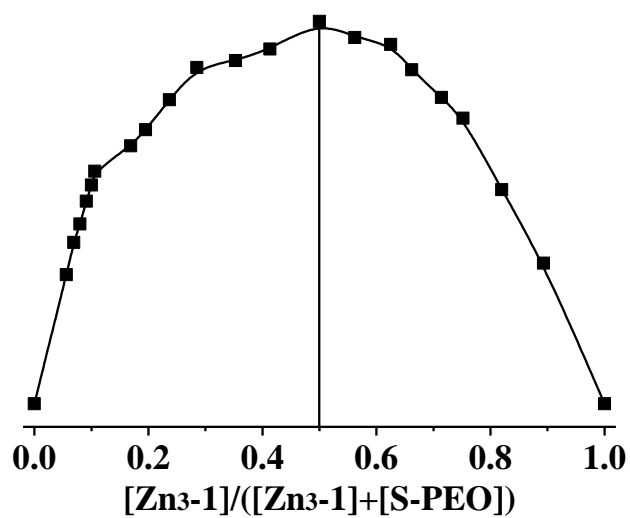

**Figure S8.** Job's plot for complexation of [Zn<sub>3</sub>-1] and S-PEO by <sup>1</sup>H NMR spectroscopy.

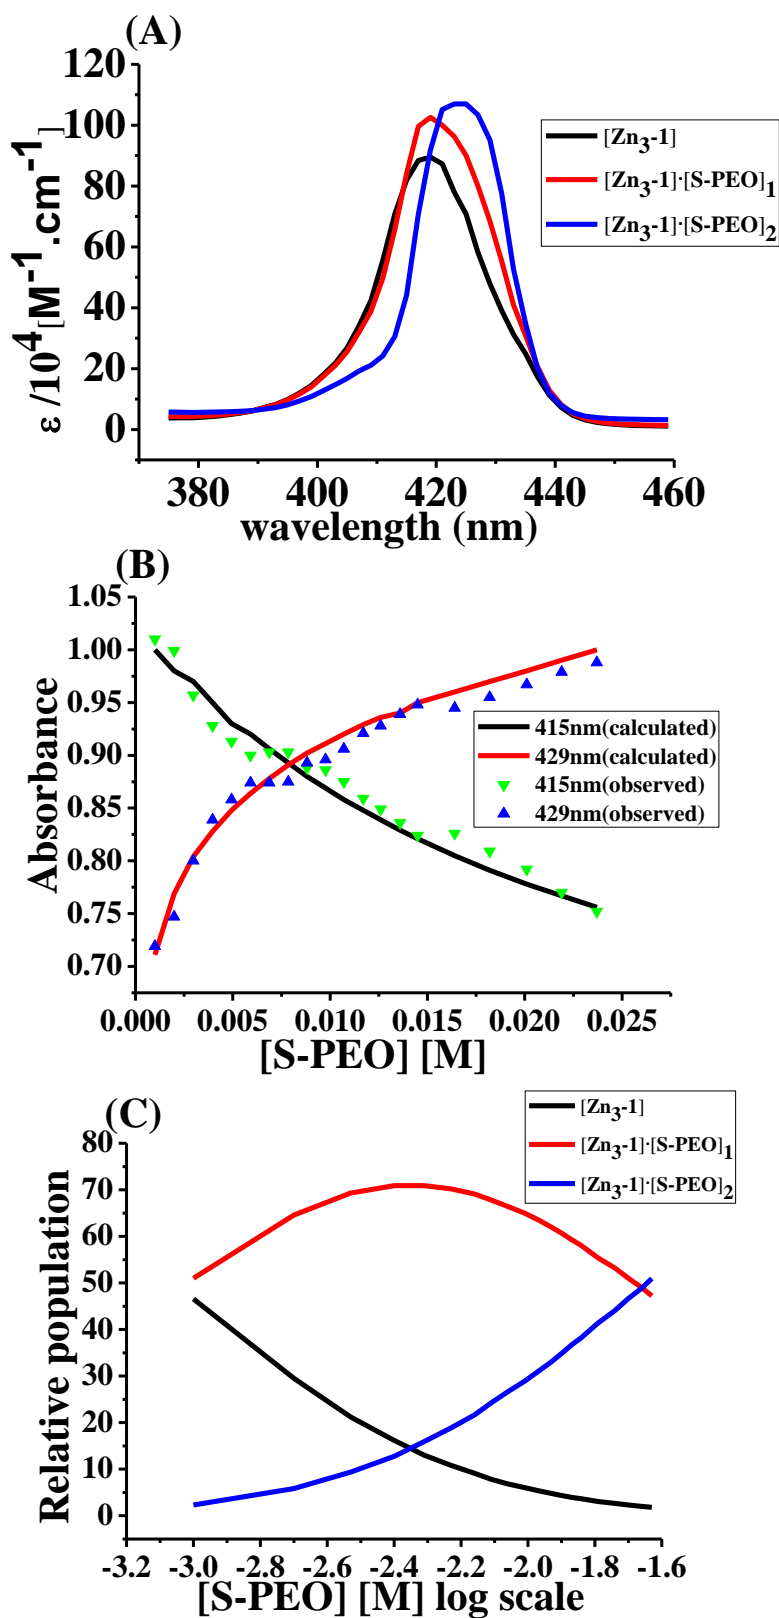

**Figure S9.** (A) Observed UV-visible spectrum of  $[Zn_3-1]$  and calculated UV-visible spectra of  $[Zn_3-1] \cdot (S-PEO)$ ,  $[Zn_3-1] \cdot (S-PEO)_2$ . (B) Fits of the absorbance data at selected wavelengths of 415 and 429 nm. (C) Species distribution plots of  $[Zn_3-1] \cdot (S-PEO)$ ,  $[Zn_3-1] \cdot (S-PEO)_2$ .

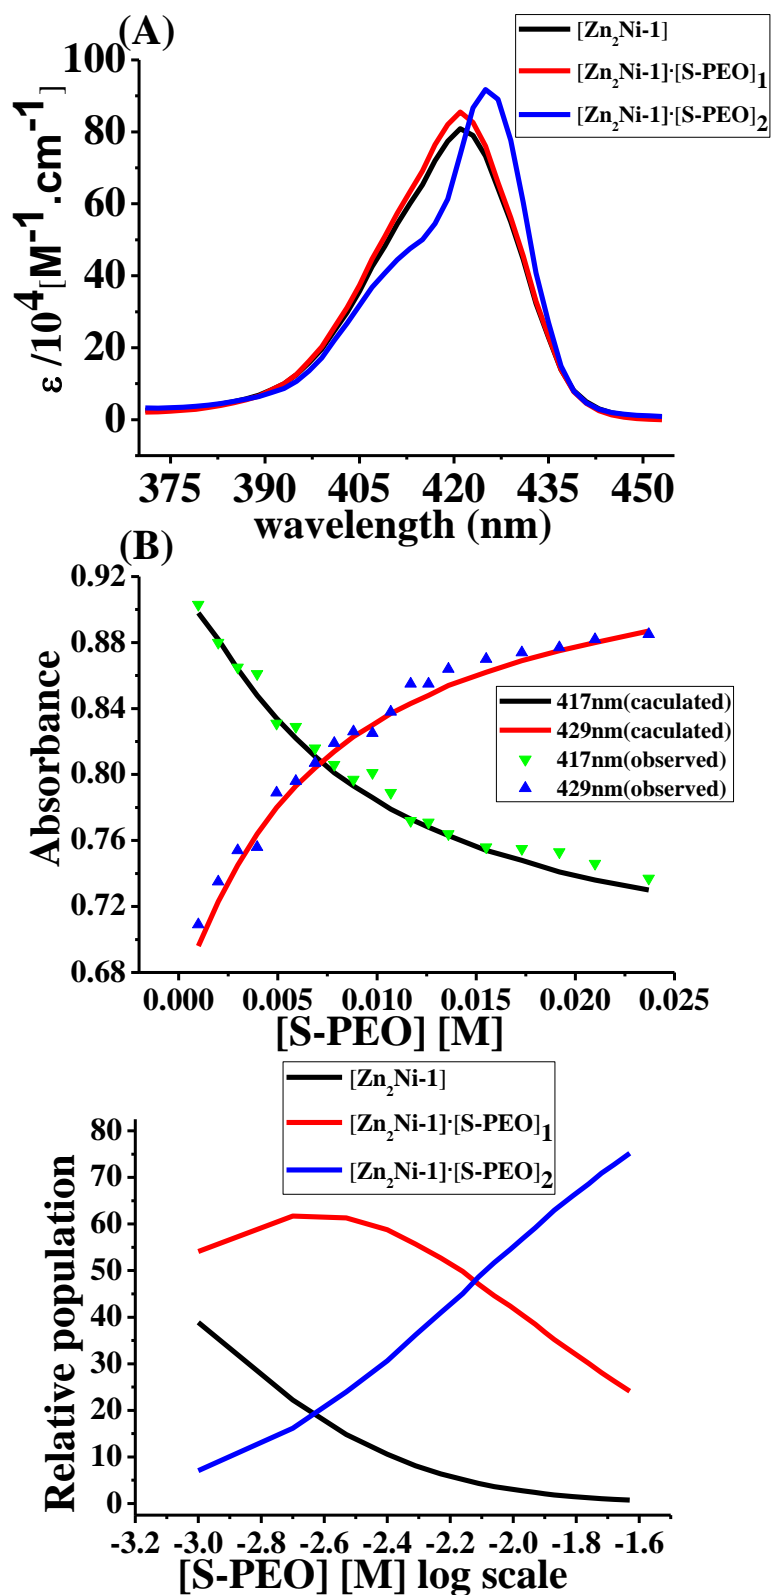

**Figure S10.** (A) Observed UV-visible spectrum of  $[Zn_3-1]$  and calculated UV-visible spectra of  $[Zn_2Ni-1] \cdot (S-PEO)$ ,  $[Zn_2Ni-1] \cdot (S-PEO)_2$ . (B) Fits of the absorbance data at selected wavelengths of 417 and 429 nm. (C) Species distribution plots of  $[Zn_2Ni-1] \cdot (S-PEO)$ ,  $[Zn_2Ni-1] \cdot (S-PEO)_2$ .

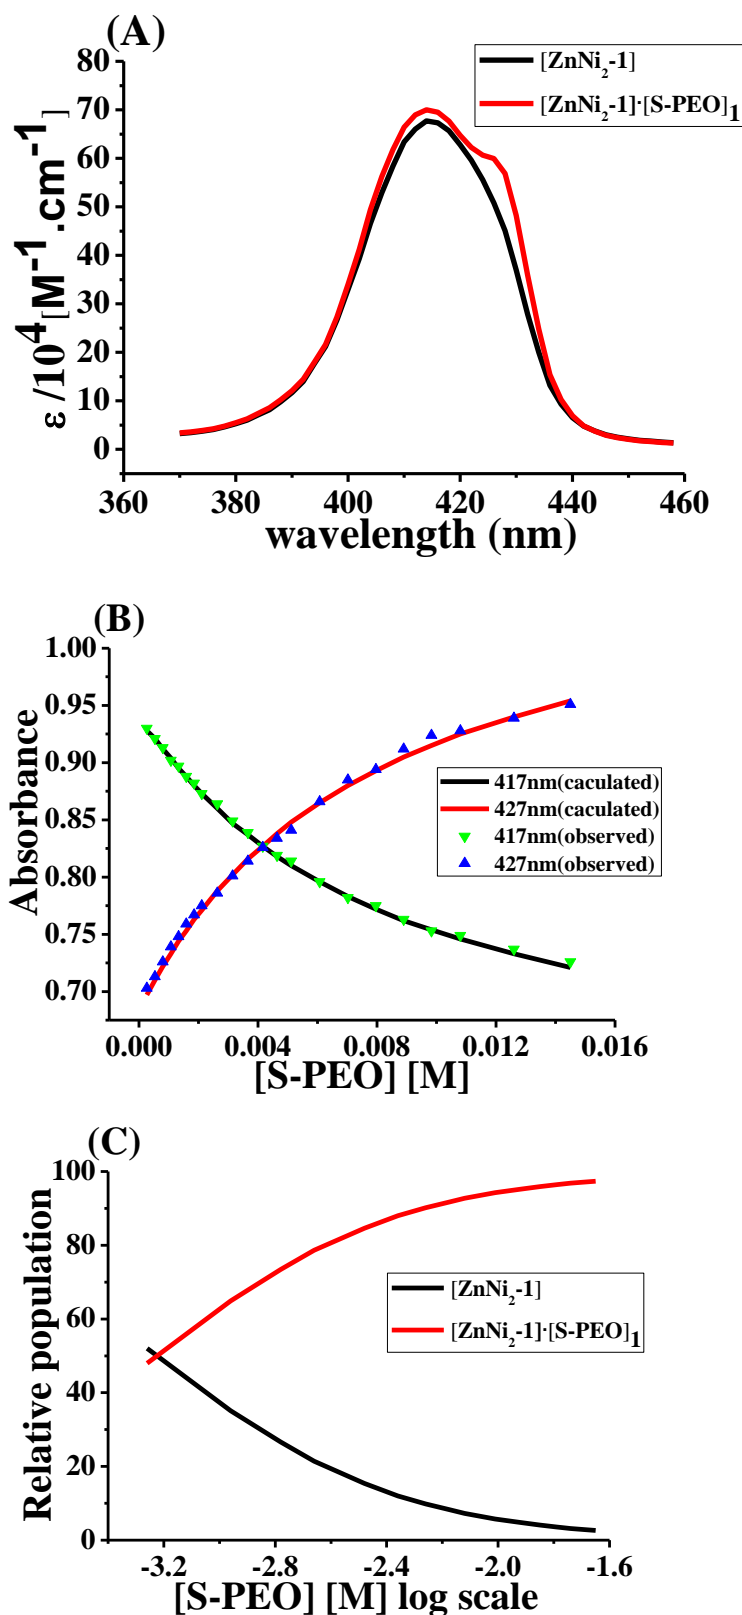

**Figure S11.** (A) Observed UV-visible spectrum of  $[ZnNi_2-1]$  and calculated UV-visible spectra of  $[ZnNi_2-1] \cdot (S-PEO)$ . (B) Fits of the absorbance data at selected wavelengths of 417 and 427 nm. (C) Species distribution plots of  $[ZnNi_2-1] \cdot (S-PEO)$ .

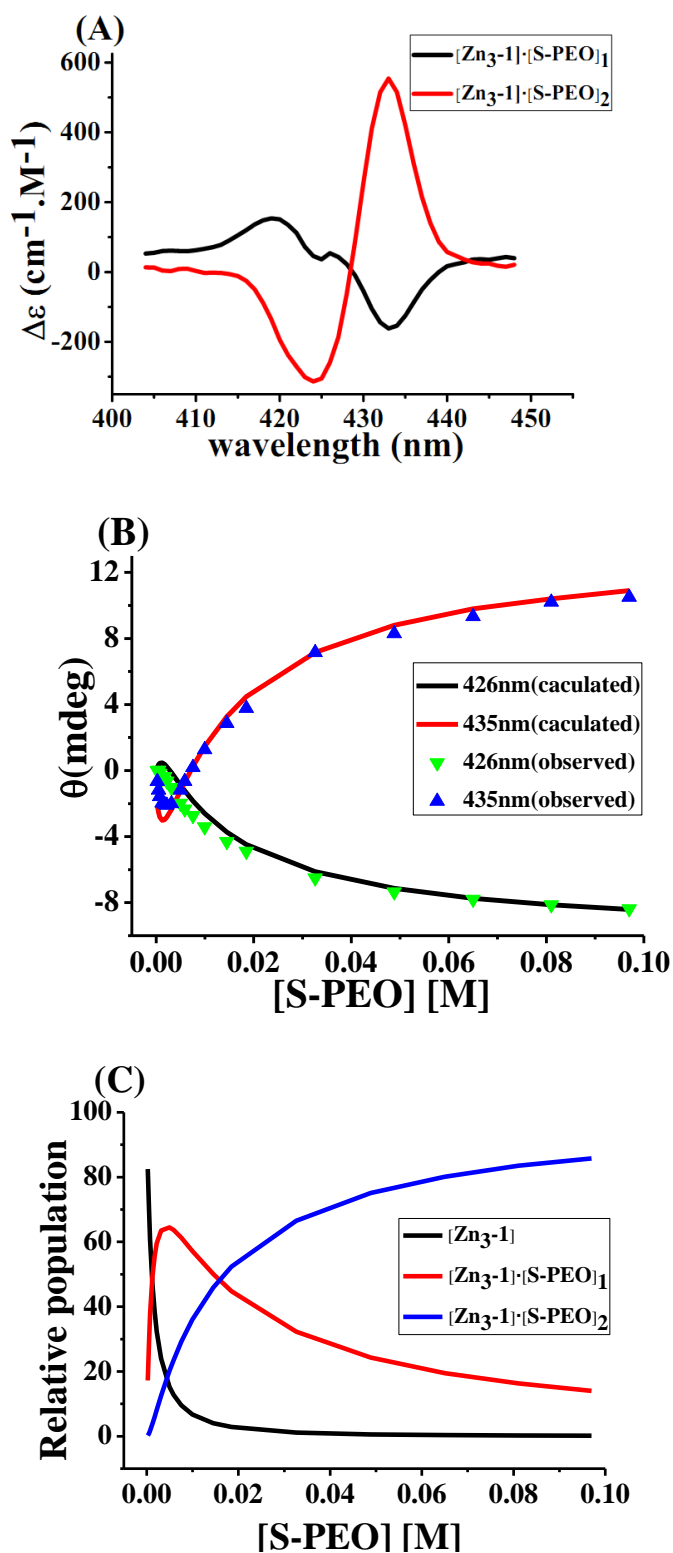

**Figure S12.**  $K_1$  and  $K_2$  are found to be  $0.85 \pm (0.07) \times 10^3$  and  $0.63 \pm (0.04) \times 10^2$ . (A) Calculated CD spectra of  $[Zn_3-1]\cdot(S-PEO)$  and  $[Zn_3-1]\cdot(S-PEO)_2$ . (B) Fits of the CD data at selected wavelengths of 426 and 435 nm. (C) Species distribution plots of  $[Zn_3-1]$ ,  $[Zn_3-1]\cdot(S-PEO)$ ,  $[Zn_3-1]\cdot(S-PEO)_2$ .

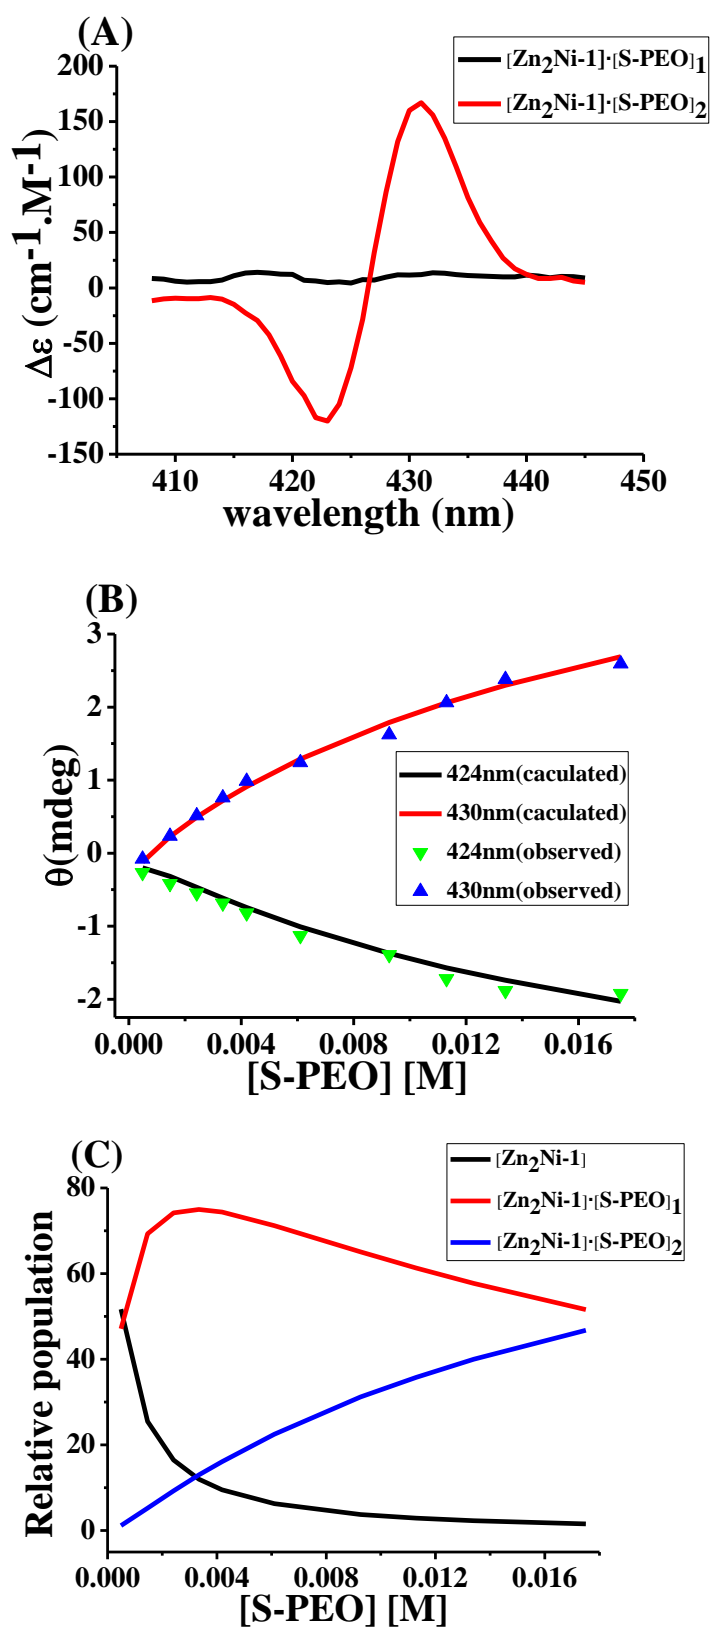

**Figure S13.**  $K_1$  and  $K_2$  are found to be  $1.16 \pm (0.28) \times 10^3$  and  $0.52 \pm (0.14) \times 10^2$ . (A) Calculated CD spectra of  $[\text{Zn}_2\text{Ni-1}]\cdot(\text{S-PEO})$ ,  $[\text{Zn}_2\text{Ni-1}]\cdot(\text{S-PEO})_2$ . (B) Fits of the CD data at selected wavelengths of 424 and 430 nm. (C) Species distribution plots of  $[\text{Zn}_2\text{Ni-1}]$ ,  $[\text{Zn}_2\text{Ni-1}]\cdot(\text{S-PEO})$  and  $[\text{Zn}_2\text{Ni-1}]\cdot(\text{S-PEO})_2$ .

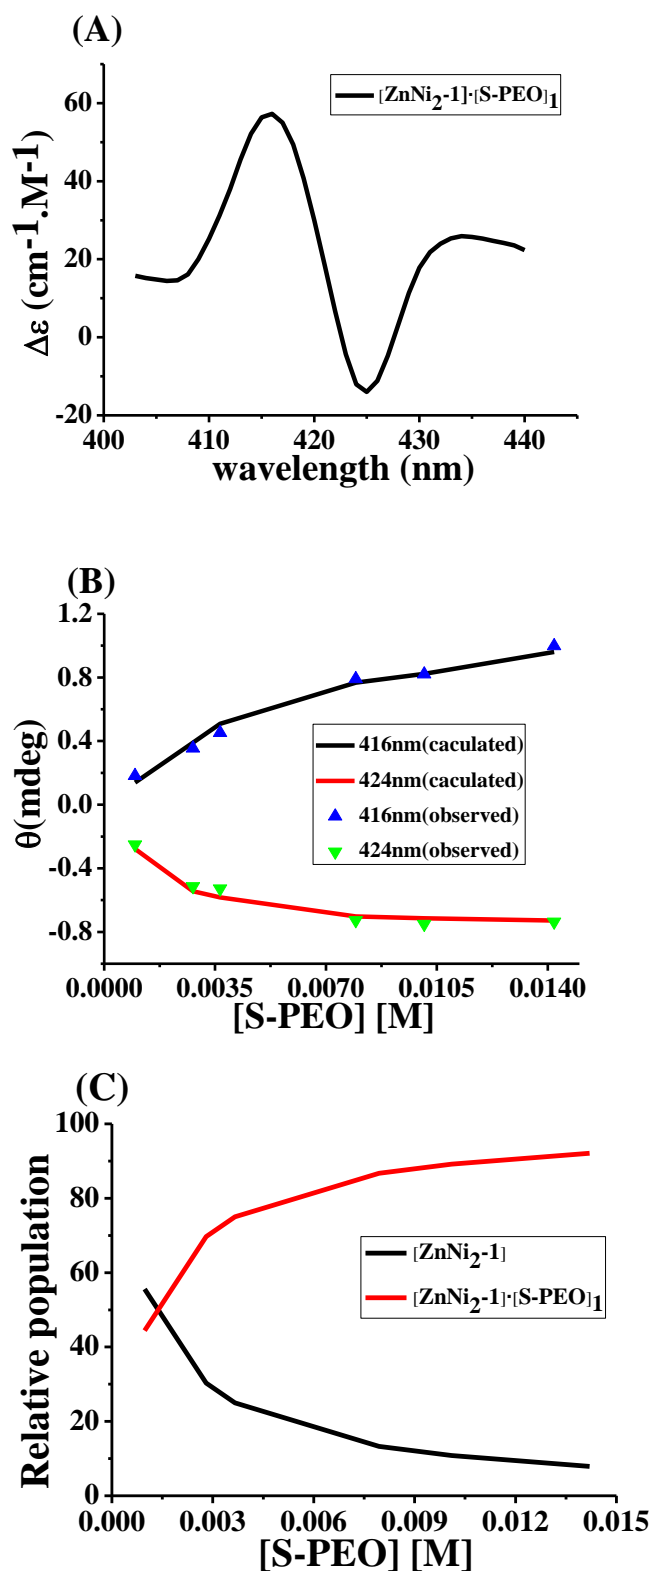

**Figure S14.**  $K_1$  is found to be  $0.82 \pm (0.10) \times 10^3$ . (A) Calculated CD spectrum of  $[\text{ZnNi}_2\text{-1}] \cdot (\text{S-PEO})$ . (B) Fits of the CD data at selected wavelengths of 416 and 424 nm. (C) Species distribution plots of  $[\text{ZnNi}_2\text{-1}]$  and  $[\text{ZnNi}_2\text{-1}] \cdot (\text{S-PEO})$ .



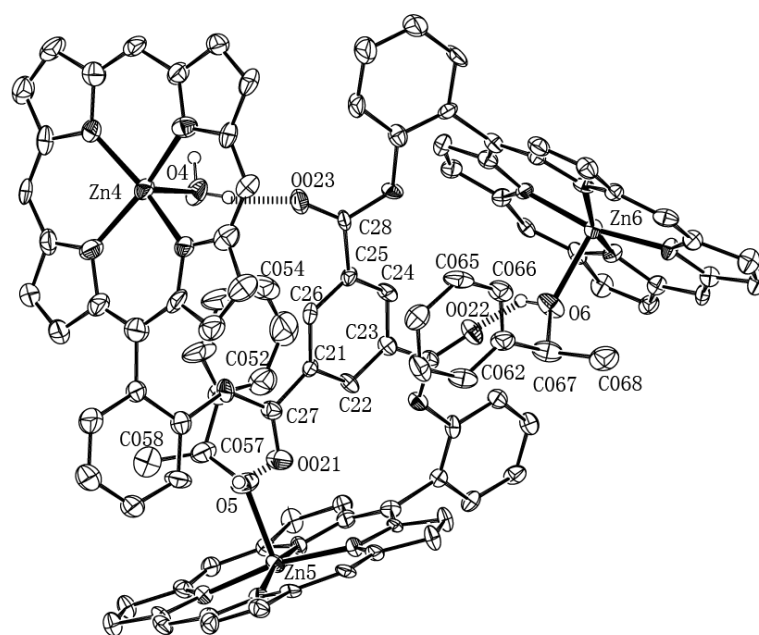

**Figure S15.** ORTEP view for  $[Zn_3-1] \cdot (S-PEO)_2 \cdot H_2O$  (mol B) at 50% probability thermal ellipsoids. Hydrogen bonds are shown by dash lines. Some phenyl rings and some hydrogens have been omitted for clarity.

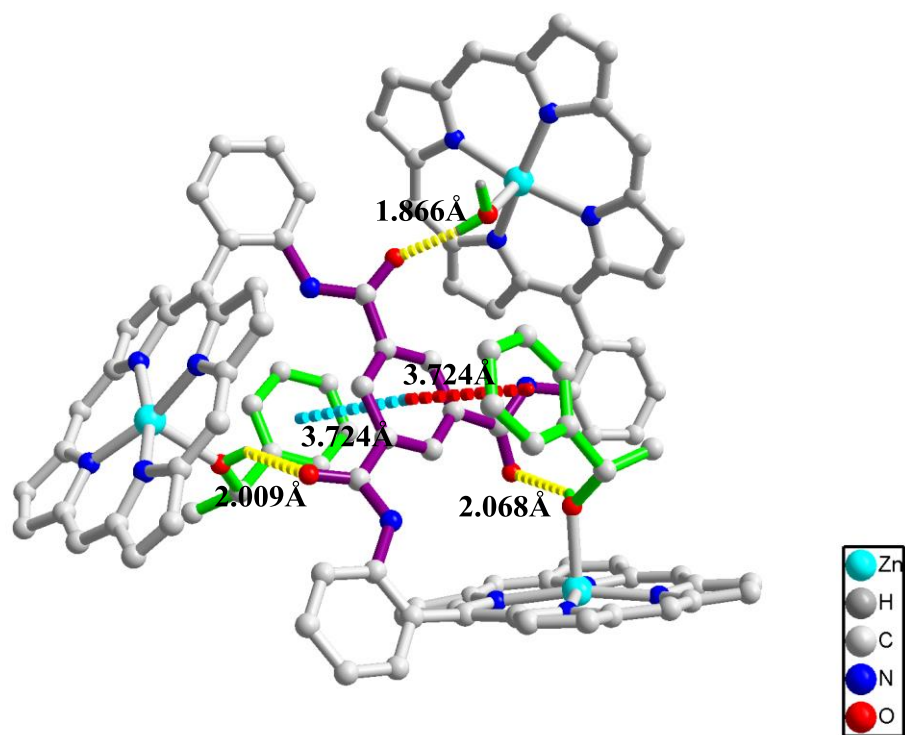

**Figure S16.** Another view showing hydrogen bonds and  $\pi$ - $\pi$  interactions in  $[\text{Zn}_3\text{-1}] \cdot (\text{S-PEO})_2 \cdot \text{H}_2\text{O}$  (mol B). All hydrogen and some phenyl rings have been omitted for clarity.

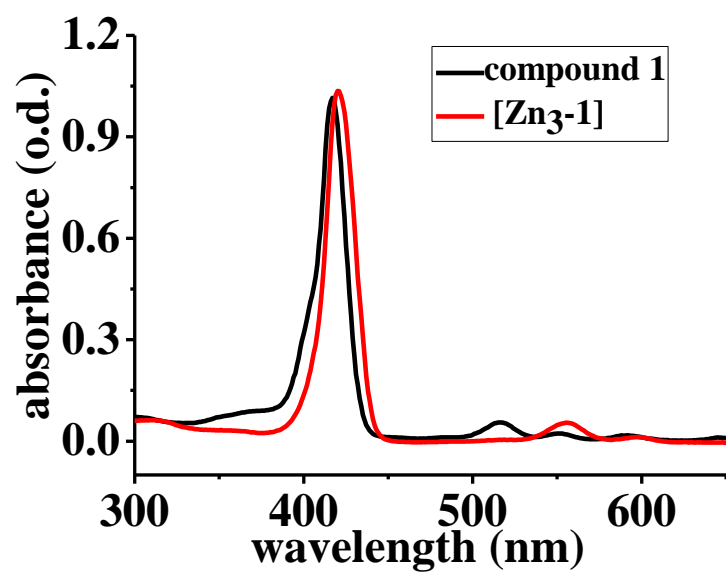

Figure S17. Comparison of **1** and [Zn<sub>3</sub>-**1**] in UV-vis spectra .

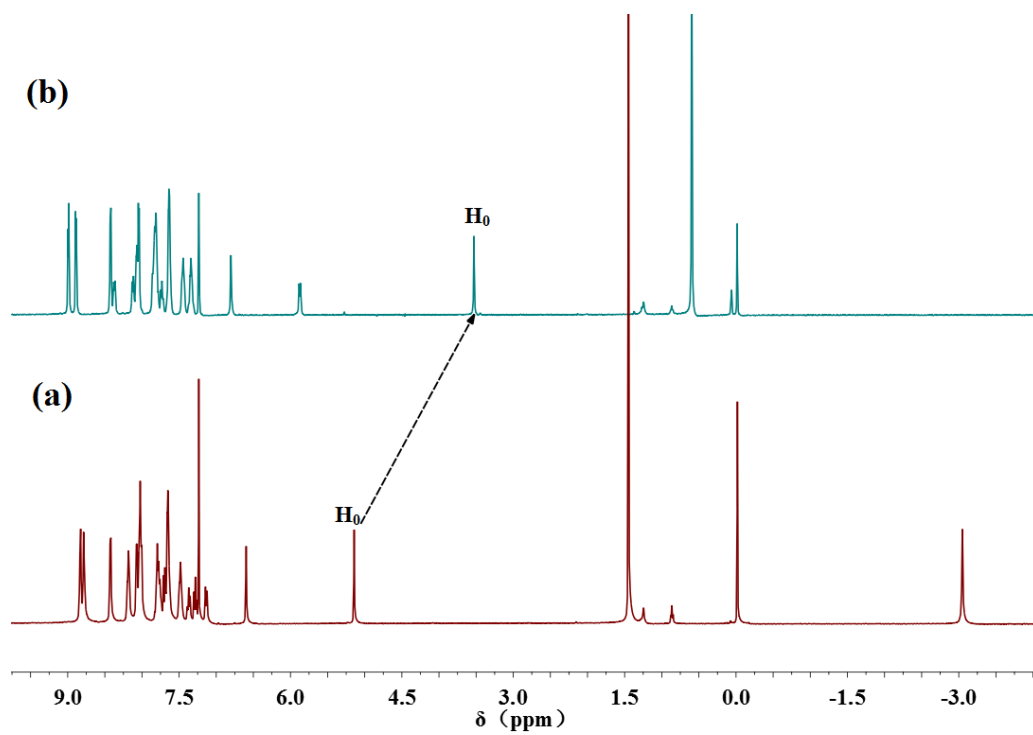

**Figure S18.** Comparison of <sup>1</sup>H NMR. (a) **1** and (b) [**Zn<sub>3</sub>-1**] in CDCl<sub>3</sub>.

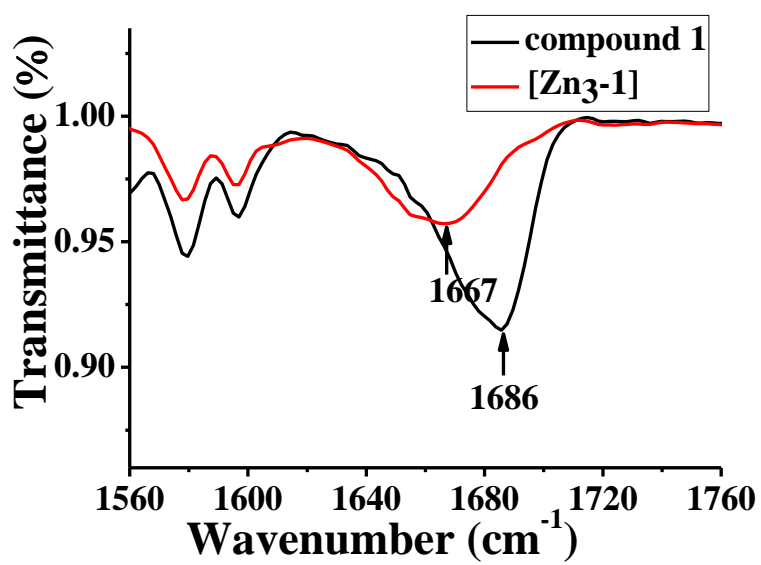

Figure S19. Comparison of **1** and [Zn<sub>3</sub>-1] in IR.

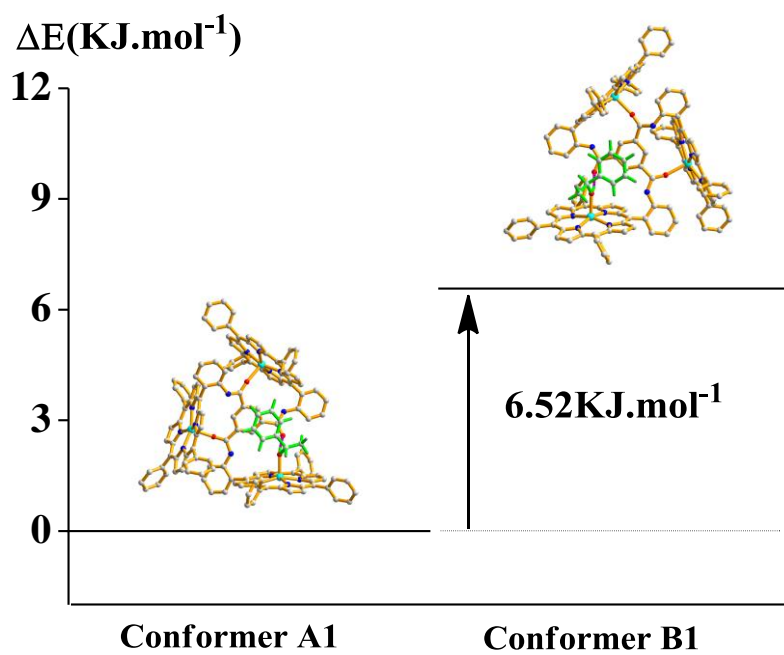

**Figure S20.** Relative energies of DFT-optimized conformer B1 and conformer A1 of  $[Zn_3-1] \cdot (S-PEO)_1$ .

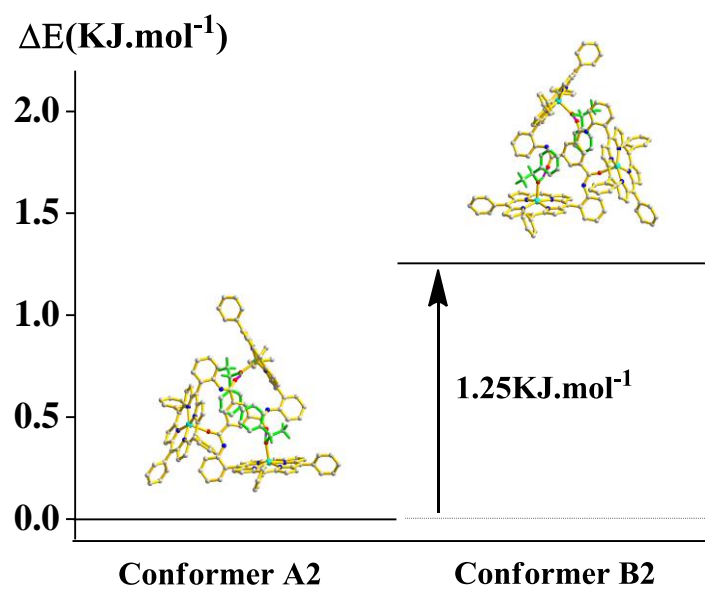

**Figure S21.** Relative energies of DFT-optimized conformer A2 and conformer B2 of  $[\text{Zn}_3-1] \cdot (\text{S-PEO})_2$ .

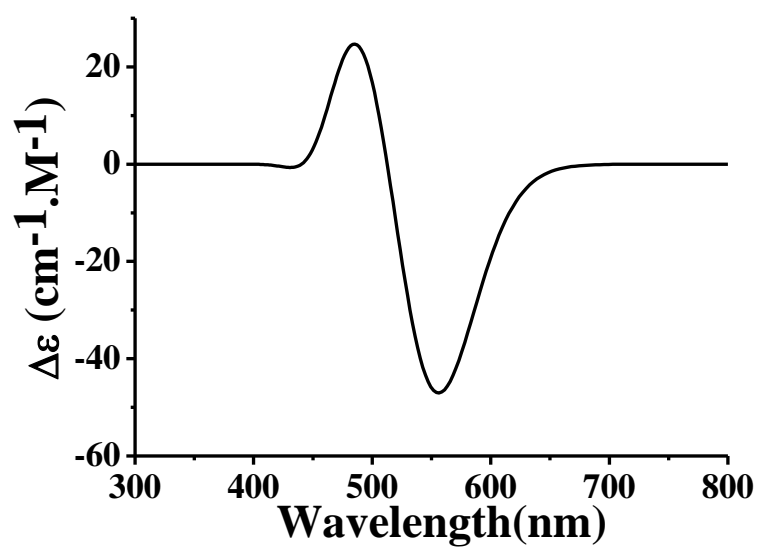

**Figure S22.** Calculated CD spectrum for the conformer A1.



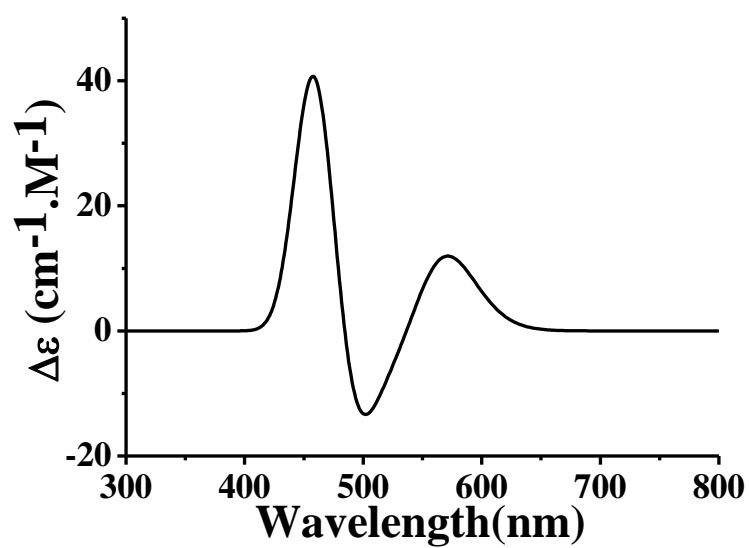

**Figure S23.** Calculated CD spectrum for the conformer A2.

**Table S1.** Calculated Binding Constants of the Complexes with 1-phenylethylalcohols at 295 K.

| compound               | Binding Constant $K_1^{a,b}$                                            | Binding Constant $K_2^{a,b}$                                            |
|------------------------|-------------------------------------------------------------------------|-------------------------------------------------------------------------|
| [Zn <sub>3</sub> -1]   | 1.10 ( $\pm 0.06$ ) $\times 10^3$<br>[0.85 $\pm$ (0.07) $\times 10^3$ ] | 0.45 ( $\pm 0.05$ ) $\times 10^2$<br>[0.63 $\pm$ (0.04) $\times 10^2$ ] |
| [Zn <sub>2</sub> Ni-1] | 1.4 ( $\pm 0.2$ ) $\times 10^3$<br>[1.16 $\pm$ (0.28) $\times 10^3$ ]   | 1.3 ( $\pm 0.2$ ) $\times 10^2$<br>[0.52 $\pm$ (0.14) $\times 10^2$ ]   |
| [ZnNi <sub>2</sub> -1] | 1.66 ( $\pm 0.20$ ) $\times 10^3$<br>[0.82 $\pm$ (0.10) $\times 10^3$ ] |                                                                         |

<sup>a</sup>Calculated from UV-visible spectral measurement. <sup>b</sup>Values shown within the bracket are calculated from CD spectral measurement.

**Table S2.** Bond lengths (Å) and angles (°) for hydrogen bonds for  
[Zn<sub>3</sub>-1]·(S-PEO)<sub>2</sub>·H<sub>2</sub>O.

| D-H...A    | D-H   | H..A  | D...A | <(DHA) |
|------------|-------|-------|-------|--------|
| O1-H1-O013 | 0.820 | 1.942 | 2.692 | 151.84 |
| O2-H2-O011 | 0.820 | 1.911 | 2.722 | 169.24 |
| O3-H3-O012 | 0.820 | 1.839 | 2.655 | 173.56 |
| O4-H4-O023 | 0.820 | 1.866 | 2.681 | 172.68 |
| O5-H5-O021 | 0.820 | 2.068 | 2.733 | 137.98 |
| O6-H6-O022 | 0.820 | 2.009 | 2.700 | 141.62 |

**Table S3.** Selected bond distances (Å) for [Zn<sub>3</sub>-1]·(S-PEO)<sub>2</sub>·H<sub>2</sub>O.

|             |          |             |          |             |          |
|-------------|----------|-------------|----------|-------------|----------|
| Zn(1)-N(14) | 2.053(5) | Zn(3)-N(34) | 2.058(4) | Zn(5)-N(52) | 2.030(3) |
| Zn(1)-N(13) | 2.057(5) | Zn(3)-N(32) | 2.062(4) | Zn(5)-N(51) | 2.054(4) |
| Zn(1)-N(12) | 2.062(5) | Zn(3)-N(31) | 2.062(4) | Zn(5)-N(54) | 2.060(3) |
| Zn(1)-N(11) | 2.065(5) | Zn(3)-O(33) | 2.075(4) | Zn(5)-N(53) | 2.088(4) |
| Zn(1)-O(1)  | 2.166(4) | Zn(3)-O(3)  | 2.116(3) | Zn(5)-O(5)  | 2.124(3) |
| Zn(2)-N(23) | 2.043(4) | Zn(4)-N(41) | 2.041(5) | Zn(6)-N(63) | 2.017(4) |
| Zn(2)-N(24) | 2.048(4) | Zn(4)-N(43) | 2.040(5) | Zn(6)-N(61) | 2.060(4) |
| Zn(2)-N(22) | 2.056(4) | Zn(4)-N(44) | 2.067(5) | Zn(6)-N(64) | 2.063(4) |
| Zn(2)-N(21) | 2.063(4) | Zn(4)-N(41) | 2.084(4) | Zn(6)-N(62) | 2.065(4) |
| Zn(2)-O(2)  | 2.199(4) | Zn(4)-O(4)  | 2.145(4) | Zn(6)-O(6)  | 2.180(3) |

symmetry code: a) -1+X, -1-Y, 1/2+Z, b) X, -1-Y, 1/2+Z, c) -1+X, -Y, 1/2+Z, d)  
1/2+X, 1/2+Y, Z

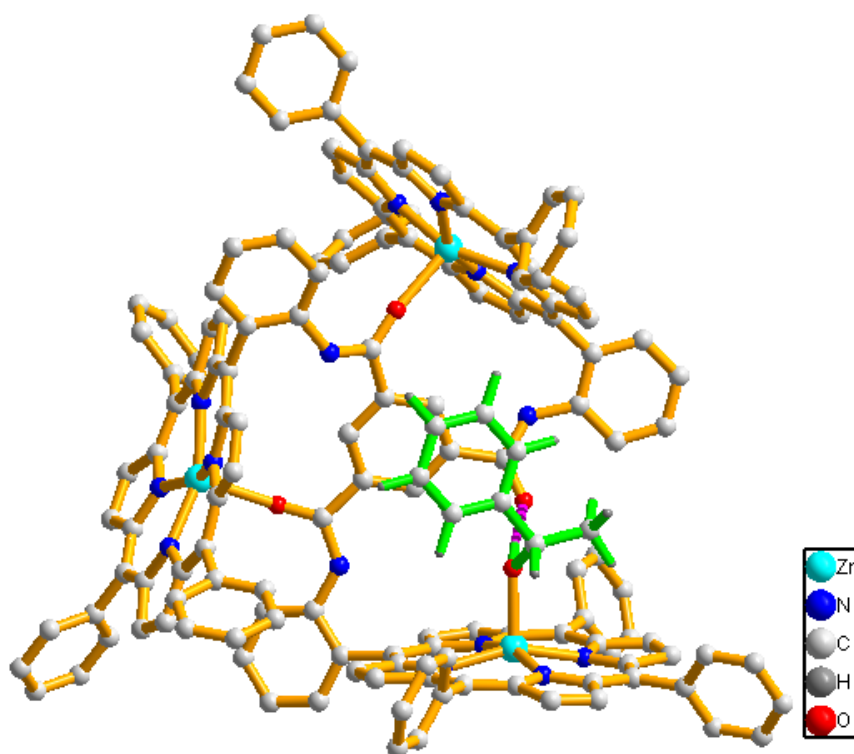

Conformer A1

$$\Delta E^{\theta} = -12196.26369020 \text{ hartree}$$

Cartesian coordinates for Geometry Optimized Conformer A1

| Atoms | x           | y          | z           |
|-------|-------------|------------|-------------|
| Zn    | -1.94510700 | 4.79168600 | -0.67341100 |
| N     | -3.77448100 | 3.83527000 | -0.39899500 |
| N     | -2.49956100 | 6.12512200 | 0.80365500  |
| N     | -0.60071300 | 6.20496200 | -1.37660900 |
| N     | -1.82311900 | 3.87115200 | -2.53035500 |
| C     | -3.81983300 | 2.40840300 | -2.42196800 |
| C     | -4.41851400 | 4.87011600 | 1.75203300  |
| C     | -0.86678500 | 7.94124500 | 0.37270900  |
| C     | 0.23516900  | 4.97543200 | -3.35653300 |

|   |             |            |             |
|---|-------------|------------|-------------|
| C | -4.30532100 | 2.82855300 | -1.16956900 |
| C | -4.54980100 | 3.90728400 | 0.73447600  |
| C | -3.50172100 | 5.94060300 | 1.72378800  |
| C | -1.93517900 | 7.34925800 | 1.07679600  |
| C | -0.22412900 | 7.36346300 | -0.74342800 |
| C | 0.29923800  | 6.00414100 | -2.39681700 |
| C | -0.80123500 | 4.02458100 | -3.43603200 |
| C | -2.65701400 | 2.90434200 | -3.04149000 |
| C | -5.43608200 | 2.23246900 | -0.49243400 |
| H | -6.03819400 | 1.42014200 | -0.87413700 |
| C | -5.57420300 | 2.88458900 | 0.69355400  |
| H | -6.31129800 | 2.70204500 | 1.46183600  |
| C | -3.57170600 | 7.08254300 | 2.60847600  |
| H | -4.28823600 | 7.21260000 | 3.40632800  |
| C | -2.61991200 | 7.96134600 | 2.19584500  |
| H | -2.41541000 | 8.94344100 | 2.59519700  |
| C | 0.96801300  | 7.89663300 | -1.36898700 |
| H | 1.49210500  | 8.78895700 | -1.05983800 |
| C | 1.30050800  | 7.04792800 | -2.37847300 |
| H | 2.14158200  | 7.12209000 | -3.05224300 |
| C | -0.99182000 | 3.11922400 | -4.54860700 |
| H | -0.34822800 | 3.04861100 | -5.41350800 |
| C | -2.14392000 | 2.43320000 | -4.30988300 |
| H | -2.61962300 | 1.69521700 | -4.94127600 |
| C | -4.52969000 | 1.25334500 | -3.07528300 |
| C | -5.61763000 | 1.43235200 | -3.93357600 |

|   |             |             |             |
|---|-------------|-------------|-------------|
| H | -5.93953900 | 2.44331200  | -4.16686400 |
| C | -6.29253600 | 0.33372000  | -4.47203700 |
| H | -7.13714200 | 0.49043700  | -5.13710900 |
| C | -5.88525600 | -0.96144500 | -4.14928900 |
| H | -6.40971500 | -1.82008400 | -4.55667500 |
| C | -4.79406900 | -1.17104600 | -3.30443400 |
| H | -4.46785100 | -2.17324500 | -3.05607600 |
| C | -4.12134400 | -0.06668200 | -2.77968700 |
| C | -5.36013200 | 4.80797600  | 2.91503200  |
| C | -4.87263200 | 4.55397400  | 4.20698700  |
| H | -3.80788500 | 4.39052600  | 4.34790500  |
| C | -5.73728400 | 4.50632700  | 5.30188300  |
| H | -5.33892200 | 4.30921000  | 6.29388800  |
| C | -7.10716700 | 4.71355100  | 5.12423300  |
| H | -7.78081500 | 4.68066700  | 5.97640500  |
| C | -7.60451900 | 4.97081700  | 3.84498500  |
| H | -8.66758300 | 5.14252200  | 3.69770700  |
| C | -6.73894700 | 5.01915000  | 2.75174200  |
| H | -7.12790900 | 5.23388100  | 1.76046500  |
| C | -0.38548200 | 9.28237200  | 0.83222600  |
| C | -0.44348400 | 10.39169700 | -0.02847800 |
| H | -0.84957000 | 10.26380500 | -1.02769700 |
| C | -0.00021300 | 11.64710200 | 0.38790800  |
| H | -0.06076800 | 12.49149300 | -0.29377900 |
| C | 0.51186100  | 11.82134700 | 1.67499200  |
| H | 0.85817100  | 12.79909000 | 1.99890500  |

|    |             |             |             |
|----|-------------|-------------|-------------|
| C  | 0.57288600  | 10.73042400 | 2.54348500  |
| H  | 0.97041200  | 10.85330300 | 3.54759000  |
| C  | 0.12643300  | 9.47556200  | 2.12690400  |
| H  | 0.17406500  | 8.63194100  | 2.80971200  |
| C  | 1.29994700  | 4.91666200  | -4.40943900 |
| C  | 1.40922300  | 5.91611600  | -5.38943000 |
| H  | 0.71031700  | 6.74781200  | -5.37739400 |
| C  | 2.39135000  | 5.84260400  | -6.37825600 |
| H  | 2.45614600  | 6.62417200  | -7.13091600 |
| C  | 3.28069300  | 4.76670600  | -6.40662300 |
| H  | 4.04447100  | 4.70789200  | -7.17738100 |
| C  | 3.18316600  | 3.76502100  | -5.43891000 |
| H  | 3.87053700  | 2.92309800  | -5.45411200 |
| C  | 2.20168300  | 3.84085900  | -4.44906900 |
| H  | 2.13918800  | 3.06639900  | -3.68970500 |
| Zn | -4.25144800 | -3.93078900 | 0.19784100  |
| N  | -3.69547100 | -3.92057400 | 2.20703800  |
| N  | -6.06928000 | -3.12461100 | 0.76435800  |
| N  | -5.16374600 | -4.63445300 | -1.53116800 |
| N  | -2.72608000 | -5.31315200 | -0.13147900 |
| C  | -1.59203400 | -5.23121000 | 2.06855000  |
| C  | -5.52241200 | -2.50678700 | 3.10039000  |
| C  | -7.35898700 | -3.50310900 | -1.31600600 |
| C  | -3.27920200 | -5.94574700 | -2.46315000 |
| C  | -2.54951200 | -4.45266600 | 2.74961100  |
| C  | -4.30401700 | -3.20237500 | 3.20944900  |



|   |             |             |             |
|---|-------------|-------------|-------------|
| C | -6.35020900 | -2.51506000 | 1.96153500  |
| C | -7.18891200 | -2.98370700 | -0.01887100 |
| C | -6.39647900 | -4.26257200 | -2.01021400 |
| C | -4.55050900 | -5.34429900 | -2.53556100 |
| C | -2.45167600 | -5.93889900 | -1.32517700 |
| C | -1.69472900 | -5.62940200 | 0.72085800  |
| C | -2.43597500 | -4.06229700 | 4.13934900  |
| H | -1.64223800 | -4.36160300 | 4.81010700  |
| C | -3.51213900 | -3.27771300 | 4.41835500  |
| H | -3.75798100 | -2.80455200 | 5.35775600  |
| C | -7.68690200 | -1.96027600 | 1.92961300  |
| H | -8.16870200 | -1.44559900 | 2.74813200  |
| C | -8.20913500 | -2.25977500 | 0.71089500  |
| H | -9.20011700 | -2.03578800 | 0.34421300  |
| C | -6.55931900 | -4.74168000 | -3.36670700 |
| H | -7.43322900 | -4.58967900 | -3.98360400 |
| C | -5.41534900 | -5.40205700 | -3.69431000 |
| H | -5.17806400 | -5.88829700 | -4.62941800 |
| C | -1.20036500 | -6.66008100 | -1.22453200 |
| H | -0.75939500 | -7.25739500 | -2.00953800 |
| C | -0.72801800 | -6.46155400 | 0.03653600  |
| H | 0.17345400  | -6.86448700 | 0.47549100  |
| C | -0.31618000 | -5.57306100 | 2.79240600  |
| C | -0.06378100 | -6.85392400 | 3.29107000  |
| H | -0.83701000 | -7.61100000 | 3.19602300  |
| C | 1.16048100  | -7.16931000 | 3.88599000  |

|   |              |             |             |
|---|--------------|-------------|-------------|
| H | 1.33583600   | -8.17230600 | 4.26443400  |
| C | 2.15412000   | -6.19568000 | 3.98578600  |
| H | 3.11072700   | -6.43496000 | 4.44162900  |
| C | 1.93011500   | -4.90163400 | 3.51365400  |
| H | 2.69399700   | -4.13847800 | 3.59077300  |
| C | 0.69882500   | -4.59290300 | 2.92724500  |
| C | -6.00055500  | -1.73241300 | 4.29155600  |
| C | -6.01597200  | -0.32907500 | 4.26393900  |
| H | -5.66791300  | 0.18821600  | 3.37373700  |
| C | -6.46534700  | 0.40253200  | 5.36436700  |
| H | -6.46531900  | 1.48863700  | 5.32392900  |
| C | -6.90951900  | -0.25958800 | 6.51061600  |
| H | -7.26099600  | 0.30846400  | 7.36804600  |
| C | -6.90248700  | -1.65517900 | 6.54977900  |
| H | -7.25317500  | -2.17824900 | 7.43578800  |
| C | -6.45219600  | -2.38542400 | 5.44898200  |
| H | -6.45690000  | -3.47163200 | 5.47738100  |
| C | -8.66718700  | -3.24703800 | -2.00093000 |
| C | -9.03522500  | -1.95084700 | -2.39548500 |
| H | -8.35137300  | -1.12740400 | -2.21257800 |
| C | -10.25649400 | -1.71742500 | -3.02957200 |
| H | -10.52148700 | -0.70714500 | -3.33088000 |
| C | -11.13256400 | -2.77519600 | -3.27966700 |
| H | -12.08387500 | -2.59290200 | -3.77248800 |
| C | -10.77890700 | -4.06878800 | -2.89132400 |
| H | -11.45637700 | -4.89845600 | -3.07600700 |

|    |             |             |             |
|----|-------------|-------------|-------------|
| C  | -9.55762900 | -4.30191900 | -2.25789300 |
| H  | -9.28892600 | -5.30822500 | -1.94881300 |
| C  | -2.79646300 | -6.69828100 | -3.66808700 |
| C  | -1.75416500 | -6.19874800 | -4.46373600 |
| H  | -1.29704000 | -5.24691400 | -4.20765500 |
| C  | -1.30600500 | -6.90533100 | -5.58110500 |
| H  | -0.49950900 | -6.49938500 | -6.18617900 |
| C  | -1.89275600 | -8.12504300 | -5.92208800 |
| H  | -1.54373300 | -8.67553400 | -6.79166900 |
| C  | -2.93029500 | -8.63365600 | -5.13837200 |
| H  | -3.39077300 | -9.58469400 | -5.39318300 |
| C  | -3.37779100 | -7.92613500 | -4.02201600 |
| H  | -4.18150400 | -8.32641400 | -3.41023900 |
| Zn | 5.96628200  | -0.44380200 | 0.60529100  |
| N  | 6.89434100  | -1.77387700 | 1.91209400  |
| N  | 7.24987500  | -1.10722900 | -0.88993100 |
| N  | 5.69956300  | 1.30299000  | -0.50464500 |
| N  | 5.23485900  | 0.56568100  | 2.26208600  |
| C  | 4.47186700  | 2.65108300  | 1.16724100  |
| C  | 6.73372600  | 0.57928800  | -2.63226000 |
| C  | 8.29486300  | -3.02027700 | 0.28991800  |
| C  | 5.70195400  | -1.14405700 | 3.99003900  |
| C  | 4.96732600  | 2.39871000  | -0.12623200 |
| C  | 5.97265800  | 1.45962600  | -1.84208700 |
| C  | 7.36355500  | -0.58880900 | -2.15706600 |
| C  | 8.08402400  | -2.19866700 | -0.83542800 |

|   |            |             |             |
|---|------------|-------------|-------------|
| C | 7.71117500 | -2.81959000 | 1.55806800  |
| C | 6.52740300 | -1.98688200 | 3.21813700  |
| C | 5.14553100 | 0.06738300  | 3.53819600  |
| C | 4.61631400 | 1.79079000  | 2.27356200  |
| C | 4.76242300 | 3.27501100  | -1.26116500 |
| H | 4.22069600 | 4.21018900  | -1.24366200 |
| C | 5.37520000 | 2.68902300  | -2.32466200 |
| H | 5.42861800 | 3.05988700  | -3.33766000 |
| C | 8.29658900 | -1.38032800 | -2.92864600 |
| H | 8.58979400 | -1.18105200 | -3.94941400 |
| C | 8.74943100 | -2.36813200 | -2.10964800 |
| H | 9.48318200 | -3.12796700 | -2.33588900 |
| C | 7.85794400 | -3.72710700 | 2.67706000  |
| H | 8.43598500 | -4.63969300 | 2.67220900  |
| C | 7.11884500 | -3.21749300 | 3.69897600  |
| H | 6.98269700 | -3.63450000 | 4.68612000  |
| C | 4.44253400 | 1.01052900  | 4.38329900  |
| H | 4.25228600 | 0.88238500  | 5.43906300  |
| C | 4.12018100 | 2.07874900  | 3.60347100  |
| H | 3.61767600 | 2.98903400  | 3.90029000  |
| C | 3.75200500 | 3.95361900  | 1.38278300  |
| C | 4.47893200 | 5.11853600  | 1.64525300  |
| H | 5.56163700 | 5.05009200  | 1.69895900  |
| C | 3.83912600 | 6.34363800  | 1.83040900  |
| H | 4.42232700 | 7.23812500  | 2.02976600  |
| C | 2.44914400 | 6.41054300  | 1.75039800  |

|   |             |             |             |
|---|-------------|-------------|-------------|
| H | 1.94283300  | 7.36116200  | 1.87993100  |
| C | 1.69267100  | 5.26748900  | 1.49453500  |
| H | 0.61521200  | 5.32282000  | 1.42786800  |
| C | 2.34169900  | 4.04101600  | 1.31120100  |
| C | 6.91865200  | 0.92517600  | -4.07936900 |
| C | 7.72476400  | 2.00578300  | -4.46972900 |
| H | 8.22968000  | 2.59166500  | -3.70676100 |
| C | 7.88562800  | 2.32623500  | -5.81857700 |
| H | 8.51762900  | 3.16419300  | -6.10114200 |
| C | 7.24133700  | 1.57204500  | -6.80129300 |
| H | 7.36667500  | 1.82128900  | -7.85170800 |
| C | 6.43818900  | 0.49290000  | -6.42660800 |
| H | 5.93281300  | -0.10034400 | -7.18435000 |
| C | 6.28070200  | 0.17146500  | -5.07721200 |
| H | 5.65274100  | -0.66677500 | -4.78743700 |
| C | 9.21415900  | -4.19209200 | 0.12909900  |
| C | 8.87900500  | -5.26375400 | -0.71392300 |
| H | 7.93390500  | -5.24057500 | -1.24936900 |
| C | 9.73795400  | -6.35341700 | -0.86224200 |
| H | 9.45705800  | -7.17522800 | -1.51590400 |
| C | 10.95029400 | -6.39093200 | -0.17107400 |
| H | 11.62007300 | -7.23884900 | -0.28730800 |
| C | 11.29668800 | -5.33171600 | 0.66988400  |
| H | 12.24072200 | -5.34894100 | 1.20836900  |
| C | 10.43612700 | -4.24356500 | 0.81900500  |
| H | 10.71138200 | -3.41758000 | 1.46877200  |

|   |             |             |             |
|---|-------------|-------------|-------------|
| C | 5.39256100  | -1.55844400 | 5.39524900  |
| C | 6.38740000  | -1.59429000 | 6.38472900  |
| H | 7.40307000  | -1.30819200 | 6.12587600  |
| C | 6.08115300  | -1.98112900 | 7.69029100  |
| H | 6.86372100  | -1.99716000 | 8.44453000  |
| C | 4.77484900  | -2.33946800 | 8.02877100  |
| H | 4.53693400  | -2.64094900 | 9.04547500  |
| C | 3.77596100  | -2.30684400 | 7.05372000  |
| H | 2.75687400  | -2.58746900 | 7.30731700  |
| C | 4.08177800  | -1.91801400 | 5.74883100  |
| H | 3.30818700  | -1.89703900 | 4.98595500  |
| O | 4.16404700  | -1.51606000 | 0.09628300  |
| H | 3.52895000  | -1.69723500 | 0.82932100  |
| C | 2.73530300  | -2.40966200 | -1.65859400 |
| C | 1.75113000  | -3.40383400 | -1.67326300 |
| H | 1.90331600  | -4.33457800 | -1.13572200 |
| C | 0.55866700  | -3.22012100 | -2.38109900 |
| H | -0.19337300 | -4.00447700 | -2.36938800 |
| C | 0.33612100  | -2.03719500 | -3.08498300 |
| H | -0.58906700 | -1.89415000 | -3.63726200 |
| C | 1.31173300  | -1.03481100 | -3.07612100 |
| H | 1.14561400  | -0.10930100 | -3.62213700 |
| C | 2.49796900  | -1.22172400 | -2.36979300 |
| H | 3.25501600  | -0.44104200 | -2.36359400 |
| C | 4.05618600  | -2.55510100 | -0.91049900 |
| H | 4.86749000  | -2.31488900 | -1.60417500 |

|   |             |             |             |
|---|-------------|-------------|-------------|
| C | 4.32679700  | -3.92643500 | -0.29753600 |
| H | 5.31587000  | -3.92871500 | 0.16782700  |
| H | 4.30395200  | -4.70719700 | -1.06590100 |
| H | 3.58952700  | -4.17510100 | 0.47284800  |
| N | -2.97109100 | -0.18386600 | -1.95935400 |
| N | 0.37454900  | -3.30461000 | 2.44674300  |
| N | 1.64913100  | 2.82700900  | 1.09104800  |
| O | -3.32652500 | -2.07108600 | -0.70651100 |
| O | 2.37981000  | -2.22589100 | 2.12988600  |
| O | -0.49457700 | 3.45823900  | 0.55003500  |
| C | -1.52615700 | -0.58708400 | -0.10248200 |
| C | -1.15514200 | 0.75608600  | 0.03023100  |
| H | -1.74573500 | 1.55849400  | -0.39842200 |
| C | -0.00692400 | 1.11504200  | 0.74424800  |
| C | 0.74397600  | 0.11588200  | 1.38070300  |
| H | 1.61567300  | 0.34960400  | 1.98499800  |
| C | 0.34933500  | -1.22282600 | 1.29631300  |
| C | -0.77628300 | -1.56889100 | 0.54207400  |
| H | -1.06846700 | -2.60419300 | 0.40834400  |
| C | -2.70040100 | -1.02664700 | -0.93340600 |
| C | 0.34999900  | 2.57980100  | 0.78683400  |
| C | 1.14945300  | -2.28754200 | 1.99365100  |
| H | -0.62183400 | -3.17195500 | 2.32935500  |
| H | 2.26325500  | 2.02127600  | 1.10717600  |
| H | -2.35557900 | 0.61566100  | -2.03353500 |

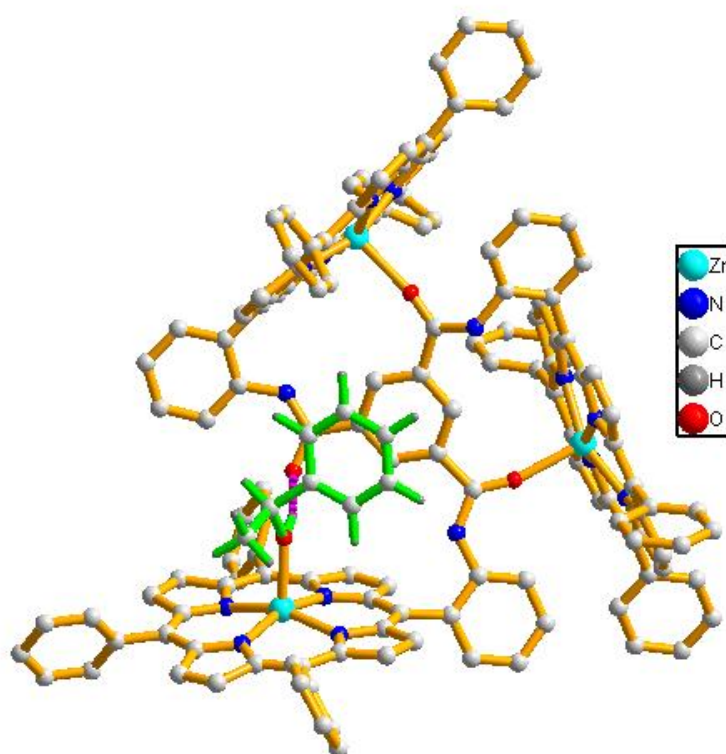

Conformer B1

$$\Delta E^{\theta} = -12196.26120580 \text{ hartree}$$

Cartesian coordinates for Geometry Optimized Conformer B1

| Atoms | x          | y          | z           |
|-------|------------|------------|-------------|
| Zn    | 2.16104600 | 4.91660600 | -0.07679600 |
| N     | 2.76996100 | 4.58730000 | -2.03902700 |
| N     | 1.27349700 | 6.67820400 | -0.72859300 |
| N     | 2.09334900 | 5.65857300 | 1.85172300  |
| N     | 3.67595900 | 3.63242500 | 0.53328600  |
| C     | 4.43291200 | 2.79067600 | -1.67031800 |
| C     | 3.49216700 | 3.95935300 | 2.98350400  |
| C     | 0.68426900 | 7.65775100 | 1.47123300  |
| C     | 1.39053000 | 6.30280200 | -3.17508900 |



|   |             |            |             |
|---|-------------|------------|-------------|
| C | 3.63972400  | 3.61988500 | -2.48463400 |
| C | 2.25235400  | 5.19079600 | -3.16066800 |
| C | 0.96642800  | 7.00261600 | -2.02884500 |
| C | 0.67122300  | 7.62726500 | 0.06395100  |
| C | 1.34303800  | 6.72241300 | 2.29018800  |
| C | 2.60279600  | 5.05108600 | 2.97298900  |
| C | 4.01209900  | 3.33677800 | 1.83375300  |
| C | 4.45423000  | 2.82620000 | -0.26248800 |
| C | 3.65089200  | 3.59468100 | -3.93169300 |
| H | 4.25762400  | 2.93955700 | -4.54115100 |
| C | 2.79712800  | 4.56849800 | -4.34868300 |
| H | 2.57389200  | 4.86057200 | -5.36456700 |
| C | 0.13736400  | 8.18780900 | -2.05614700 |
| H | -0.25646200 | 8.65596600 | -2.94638400 |
| C | -0.03573200 | 8.58002300 | -0.76485000 |
| H | -0.59213900 | 9.43245300 | -0.40238700 |
| C | 1.36605600  | 6.77659800 | 3.73594100  |
| H | 0.86848200  | 7.51973800 | 4.34190200  |
| C | 2.13089900  | 5.73476000 | 4.15853700  |
| H | 2.36801400  | 5.46071000 | 5.17602700  |
| C | 5.03894000  | 2.31719600 | 1.85396600  |
| H | 5.50705500  | 1.92105300 | 2.74347800  |
| C | 5.31216200  | 2.00110000 | 0.55908100  |
| H | 6.03901700  | 1.29109900 | 0.19019400  |
| C | 5.26305600  | 1.73048000 | -2.34020700 |
| C | 6.51875900  | 1.99942300 | -2.89292700 |

|   |             |             |             |
|---|-------------|-------------|-------------|
| H | 6.90232400  | 3.01493200  | -2.85171200 |
| C | 7.27692800  | 0.98086300  | -3.47508800 |
| H | 8.25147400  | 1.20707300  | -3.89882800 |
| C | 6.78446000  | -0.32451000 | -3.50846000 |
| H | 7.37049800  | -1.12077700 | -3.95596400 |
| C | 5.52865100  | -0.61928300 | -2.97579500 |
| H | 5.13123100  | -1.62610700 | -3.01379200 |
| C | 4.77680500  | 0.40566500  | -2.40265600 |
| C | 3.95589000  | 3.45189100  | 4.31547300  |
| C | 3.55499100  | 2.18936100  | 4.77914900  |
| H | 2.89997200  | 1.58132400  | 4.16138800  |
| C | 3.97876800  | 1.71700100  | 6.02234300  |
| H | 3.65638500  | 0.73772900  | 6.36521400  |
| C | 4.81419700  | 2.49959000  | 6.82243700  |
| H | 5.13957900  | 2.13429700  | 7.79305200  |
| C | 5.22629500  | 3.75452400  | 6.36959900  |
| H | 5.88161000  | 4.36795400  | 6.98253800  |
| C | 4.80088700  | 4.22566900  | 5.12701500  |
| H | 5.12653000  | 5.20027000  | 4.77432200  |
| C | -0.05495700 | 8.77398100  | 2.14796400  |
| C | 0.44441200  | 10.08520200 | 2.11698900  |
| H | 1.37933700  | 10.28387500 | 1.60016000  |
| C | -0.24172900 | 11.12525900 | 2.74569000  |
| H | 0.16269100  | 12.13367900 | 2.71411100  |
| C | -1.43951600 | 10.87131800 | 3.41661600  |
| H | -1.97384200 | 11.68097500 | 3.90657500  |

|    |             |             |             |
|----|-------------|-------------|-------------|
| C  | -1.94637800 | 9.57114500  | 3.45467300  |
| H  | -2.87971100 | 9.36427900  | 3.97191900  |
| C  | -1.25967400 | 8.53097800  | 2.82612600  |
| H  | -1.66047800 | 7.52155300  | 2.84932600  |
| C  | 0.92871700  | 6.80116700  | -4.51131600 |
| C  | 1.39886100  | 8.01797000  | -5.02998000 |
| H  | 2.11012400  | 8.60073100  | -4.45122300 |
| C  | 0.97058400  | 8.47592900  | -6.27666900 |
| H  | 1.34906300  | 9.41882200  | -6.66291900 |
| C  | 0.06537700  | 7.72406100  | -7.02796200 |
| H  | -0.26797300 | 8.08062900  | -7.99893800 |
| C  | -0.40802400 | 6.51106200  | -6.52470800 |
| H  | -1.11543600 | 5.92023900  | -7.10085000 |
| C  | 0.02078800  | 6.05404200  | -5.27772000 |
| H  | -0.35350300 | 5.11244900  | -4.88536400 |
| Zn | 4.36329900  | -3.85937800 | -0.15394900 |
| N  | 3.64421600  | -4.18893600 | 1.77632800  |
| N  | 6.19536700  | -3.38705400 | 0.68352300  |
| N  | 5.35057400  | -4.30325800 | -1.92555000 |
| N  | 2.75600800  | -4.99064200 | -0.85141800 |
| C  | 1.46309200  | -5.24464500 | 1.24434600  |
| C  | 5.52084500  | -3.21190900 | 3.06183200  |
| C  | 7.62533400  | -3.51349600 | -1.33684100 |
| C  | 3.43658900  | -5.19221500 | -3.22408600 |
| C  | 2.41576200  | -4.69793200 | 2.12589600  |
| C  | 4.23176700  | -3.76056300 | 2.94345000  |

|   |             |             |             |
|---|-------------|-------------|-------------|
| C | 6.43583900  | -3.08114900 | 2.00036300  |
| C | 7.39199500  | -3.23839700 | 0.02396800  |
| C | 6.65403300  | -3.99905400 | -2.23568100 |
| C | 4.75984300  | -4.73091600 | -3.09096300 |
| C | 2.52357600  | -5.32968400 | -2.16393800 |
| C | 1.64080400  | -5.37600500 | -0.14681700 |
| C | 2.21985300  | -4.57858700 | 3.55556100  |
| H | 1.34723700  | -4.91689700 | 4.09709200  |
| C | 3.33767000  | -3.98882900 | 4.05833000  |
| H | 3.54903500  | -3.74351100 | 5.08887700  |
| C | 7.82309200  | -2.70832500 | 2.17468900  |
| H | 8.28400100  | -2.43953600 | 3.11401800  |
| C | 8.41641600  | -2.81700100 | 0.95699900  |
| H | 9.45595700  | -2.65462500 | 0.71374900  |
| C | 6.88595300  | -4.22426400 | -3.64710100 |
| H | 7.82182600  | -4.06153800 | -4.16167800 |
| C | 5.71319400  | -4.66845100 | -4.17648300 |
| H | 5.51056800  | -4.93815000 | -5.20295200 |
| C | 1.21293300  | -5.93127100 | -2.29145100 |
| H | 0.78579900  | -6.30763700 | -3.21006300 |
| C | 0.66622600  | -5.95816600 | -1.04480500 |
| H | -0.29288000 | -6.35992000 | -0.74971200 |
| C | 0.11973300  | -5.62165600 | 1.81064800  |
| C | -0.85518100 | -4.61605200 | 2.02202900  |
| C | -2.13521000 | -4.93551700 | 2.48627400  |
| H | -2.86510600 | -4.14982800 | 2.63229800  |

|   |             |             |             |
|---|-------------|-------------|-------------|
| C | -2.44892800 | -6.26951800 | 2.75025600  |
| H | -3.44371800 | -6.51699600 | 3.10990100  |
| C | -1.49861500 | -7.27357200 | 2.56543500  |
| H | -1.74617100 | -8.30913600 | 2.78067400  |
| C | -0.22336000 | -6.94505600 | 2.09843500  |
| H | 0.51953800  | -7.72200600 | 1.94157600  |
| C | 5.98609000  | -2.79771900 | 4.42594200  |
| C | 6.13965100  | -1.44048400 | 4.74596400  |
| H | 5.89974800  | -0.68873000 | 3.99898700  |
| C | 6.58711200  | -1.05049000 | 6.00949100  |
| H | 6.69077300  | 0.00661100  | 6.23788300  |
| C | 6.88952600  | -2.01358300 | 6.97391900  |
| H | 7.24008400  | -1.71130900 | 7.95730800  |
| C | 6.74068400  | -3.36776200 | 6.66802900  |
| H | 6.97846300  | -4.12452300 | 7.41118700  |
| C | 6.29294800  | -3.75620700 | 5.40465800  |
| H | 6.18706700  | -4.81075500 | 5.16518400  |
| C | 9.01445700  | -3.30575500 | -1.85800800 |
| C | 9.78339200  | -4.39587900 | -2.29751100 |
| H | 9.35898000  | -5.39492600 | -2.25247400 |
| C | 11.08137200 | -4.21040300 | -2.77478400 |
| H | 11.66115600 | -5.06873600 | -3.10418600 |
| C | 11.63621300 | -2.93013400 | -2.82128100 |
| H | 12.64741700 | -2.78513600 | -3.19203400 |
| C | 10.88383900 | -1.83788000 | -2.38571000 |
| H | 11.30641000 | -0.83688100 | -2.41882900 |

|    |             |             |             |
|----|-------------|-------------|-------------|
| C  | 9.58579200  | -2.02370500 | -1.90764700 |
| H  | 9.00128000  | -1.17061600 | -1.57659900 |
| C  | 2.98774000  | -5.63232400 | -4.58735000 |
| C  | 2.14855600  | -4.82278700 | -5.36676900 |
| H  | 1.83249800  | -3.85744000 | -4.98067600 |
| C  | 1.72711100  | -5.23809000 | -6.63125300 |
| H  | 1.07797300  | -4.59575900 | -7.22056800 |
| C  | 2.13986300  | -6.47170700 | -7.13715500 |
| H  | 1.81183100  | -6.79627900 | -8.12105100 |
| C  | 2.97661800  | -7.28629900 | -6.37183600 |
| H  | 3.30115500  | -8.24950300 | -6.75697900 |
| C  | 3.39719800  | -6.86952900 | -5.10809000 |
| H  | 4.04445200  | -7.50683800 | -4.51180800 |
| Zn | -6.25793900 | -0.72335300 | 0.36899600  |
| N  | -5.18233600 | 0.43820600  | 1.73037000  |
| N  | -6.78436800 | -1.96374200 | 1.95684700  |
| N  | -7.85553400 | -1.49620200 | -0.69480600 |
| N  | -6.28851500 | 0.92563900  | -0.90380800 |
| C  | -4.74043000 | 2.42645300  | 0.31640500  |
| C  | -5.22372200 | -1.09915200 | 3.67349700  |
| C  | -8.46151500 | -3.37511100 | 0.80526100  |
| C  | -7.83948000 | 0.05697000  | -2.62725000 |
| C  | -4.63930500 | 1.68041100  | 1.50920600  |
| C  | -4.83945000 | 0.08244900  | 3.01251400  |
| C  | -6.12372100 | -2.05231800 | 3.15705400  |
| C  | -7.58769600 | -3.07361200 | 1.86930600  |

|   |              |             |             |
|---|--------------|-------------|-------------|
| C | -8.60016900  | -2.60359200 | -0.36516600 |
| C | -8.31680700  | -1.06089500 | -1.91243600 |
| C | -6.88128700  | 0.96797500  | -2.14395100 |
| C | -5.49063900  | 2.03881100  | -0.81329500 |
| C | -3.93969500  | 2.12881200  | 2.69543500  |
| H | -3.45036500  | 3.08604600  | 2.81054600  |
| C | -4.05647300  | 1.13740900  | 3.62077600  |
| H | -3.67890800  | 1.13129000  | 4.63301200  |
| C | -6.50065500  | -3.27393700 | 3.83625400  |
| H | -6.11914700  | -3.60212600 | 4.79222700  |
| C | -7.40723200  | -3.90407900 | 3.04120100  |
| H | -7.90401700  | -4.84570300 | 3.22434100  |
| C | -9.58035700  | -2.85794500 | -1.39915300 |
| H | -10.32042200 | -3.64465800 | -1.37963000 |
| C | -9.40383500  | -1.90681700 | -2.35541200 |
| H | -9.97156300  | -1.77115600 | -3.26446400 |
| C | -6.40057200  | 2.12066300  | -2.87706600 |
| H | -6.68473900  | 2.38445000  | -3.88537400 |
| C | -5.54745100  | 2.78652800  | -2.05258500 |
| H | -5.00560700  | 3.69820300  | -2.25965300 |
| C | -4.09615000  | 3.78427300  | 0.27125500  |
| C | -2.69513200  | 3.97548600  | 0.17942100  |
| C | -2.15755000  | 5.26734800  | 0.10630400  |
| H | -1.08997200  | 5.40031600  | 0.01763400  |
| C | -3.00535600  | 6.37361700  | 0.13457500  |
| H | -2.57145000  | 7.36615200  | 0.06917700  |

|   |              |             |             |
|---|--------------|-------------|-------------|
| C | -4.38523400  | 6.20746800  | 0.23730100  |
| H | -5.04533000  | 7.06984200  | 0.26359600  |
| C | -4.91535100  | 4.92027100  | 0.30242500  |
| H | -5.98876900  | 4.77503600  | 0.37960900  |
| C | -4.64530600  | -1.34709600 | 5.03237900  |
| C | -3.27350900  | -1.60562700 | 5.18326000  |
| H | -2.64598100  | -1.63941100 | 4.29729300  |
| C | -2.72551400  | -1.83207000 | 6.44650200  |
| H | -1.66233000  | -2.03659700 | 6.54364400  |
| C | -3.53897300  | -1.80134700 | 7.58082800  |
| H | -3.11184800  | -1.97604200 | 8.56482000  |
| C | -4.90464700  | -1.54497500 | 7.44372400  |
| H | -5.54466700  | -1.51421800 | 8.32176800  |
| C | -5.45298700  | -1.32081400 | 6.18025200  |
| H | -6.51441500  | -1.11361600 | 6.07615800  |
| C | -9.31901100  | -4.59633800 | 0.93461000  |
| C | -9.14994800  | -5.69014000 | 0.07046900  |
| H | -8.38048100  | -5.64561800 | -0.69529900 |
| C | -9.94894400  | -6.82770700 | 0.19076400  |
| H | -9.79807300  | -7.66557900 | -0.48506500 |
| C | -10.93491600 | -6.89183500 | 1.17703300  |
| H | -11.55846800 | -7.77702700 | 1.27039200  |
| C | -11.11533500 | -5.81083000 | 2.04198600  |
| H | -11.88426900 | -5.84861400 | 2.80930700  |
| C | -10.31424000 | -4.67470500 | 1.92222400  |
| H | -10.46149000 | -3.83208400 | 2.59186200  |



|   |              |             |             |
|---|--------------|-------------|-------------|
| C | -8.42256100  | 0.30935600  | -3.98428300 |
| C | -8.17563900  | -0.57453500 | -5.04688400 |
| H | -7.54752200  | -1.44463800 | -4.87695600 |
| C | -8.71837400  | -0.34331400 | -6.31138900 |
| H | -8.50987700  | -1.03710700 | -7.12175800 |
| C | -9.52182000  | 0.77591400  | -6.53636000 |
| H | -9.94571500  | 0.95608800  | -7.52071500 |
| C | -9.77858500  | 1.66138400  | -5.48793500 |
| H | -10.40829600 | 2.53219000  | -5.65117700 |
| C | -9.23339900  | 1.43032300  | -4.22436300 |
| H | -9.44128600  | 2.11712400  | -3.40869900 |
| O | -4.45461600  | -1.75345200 | -0.31334700 |
| H | -3.75408300  | -1.68708500 | 0.37370800  |
| C | -2.85509600  | -2.08430100 | -2.12628700 |
| C | -1.71096100  | -2.83892800 | -2.40488000 |
| H | -1.61612800  | -3.84741400 | -2.00732300 |
| C | -0.67994600  | -2.31077600 | -3.18546300 |
| H | 0.20181700   | -2.91425200 | -3.38391900 |
| C | -0.78258700  | -1.01535800 | -3.69331000 |
| H | 0.01809600   | -0.60025300 | -4.30025700 |
| C | -1.92064300  | -0.25234700 | -3.41537000 |
| H | -2.00805300  | 0.75800100  | -3.80708900 |
| C | -2.94996400  | -0.78186900 | -2.63728800 |
| H | -3.83168100  | -0.18473900 | -2.42112800 |
| C | -3.99308400  | -2.68405100 | -1.31575500 |
| H | -3.62231600  | -3.57730100 | -0.79599000 |

|   |             |             |             |
|---|-------------|-------------|-------------|
| C | -5.17690100 | -3.07802000 | -2.19334100 |
| H | -5.96732400 | -3.53801000 | -1.59375300 |
| H | -4.84768400 | -3.79190300 | -2.95559100 |
| H | -5.59074100 | -2.20043900 | -2.69952400 |
| N | 3.45961700  | 0.20009200  | -1.90946300 |
| N | -0.44360900 | -3.29594800 | 1.73138700  |
| N | -1.88766500 | 2.81171700  | 0.15679400  |
| O | 3.59486800  | -1.76880600 | -0.73978300 |
| O | -2.38753100 | -2.10875900 | 1.48424200  |
| O | 0.26501700  | 3.60764600  | 0.04253900  |
| C | 1.67452300  | -0.35732200 | -0.40503800 |
| C | 0.90633800  | -1.38503000 | 0.14142300  |
| H | 1.28589300  | -2.39587800 | 0.04544500  |
| C | -0.32326000 | -1.11311800 | 0.75197700  |
| C | -0.81354400 | 0.19665800  | 0.76603300  |
| H | -1.76533000 | 0.37608100  | 1.25742700  |
| C | -0.06426300 | 1.23614500  | 0.20129600  |
| C | 1.19196000  | 0.95577700  | -0.34614700 |
| H | 1.77080200  | 1.80140300  | -0.69923100 |
| C | 3.00102700  | -0.71963000 | -1.02258400 |
| C | -0.53729400 | 2.66544700  | 0.13961500  |
| C | -1.16028700 | -2.20775200 | 1.35180100  |
| H | 0.56120200  | -3.20954000 | 1.65435300  |
| H | -2.42888800 | 1.95526600  | 0.15134000  |
| H | 2.87242400  | 1.01460500  | -2.02606500 |

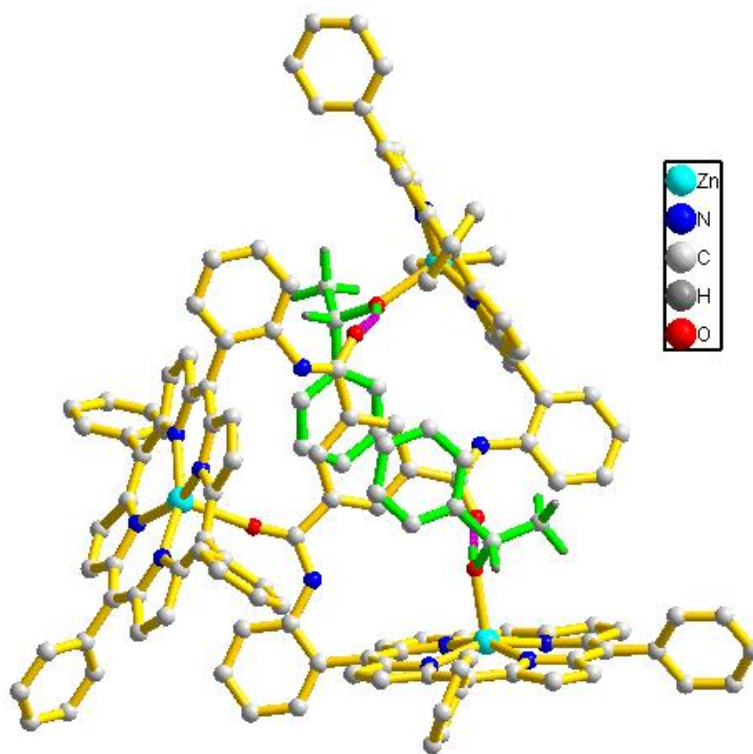

Conformer A2

$$\Delta E^{\theta} = -12582.37367400 \text{ hartree}$$

Cartesian coordinates for Geometry Optimized Conformer A2

| Atoms | x           | y          | z           |
|-------|-------------|------------|-------------|
| Zn    | -1.18652200 | 5.53640100 | 0.07433600  |
| N     | 0.88342000  | 5.61237900 | 0.17603300  |
| N     | -1.07711200 | 6.70300900 | -1.63521300 |
| N     | -3.15122500 | 6.13445200 | 0.28717100  |
| N     | -1.19499000 | 5.04396800 | 2.09502800  |
| C     | 1.23695200  | 4.81761700 | 2.49627200  |
| C     | 1.34693100  | 6.48472100 | -2.09597700 |
| C     | -3.43815600 | 7.44395000 | -1.79710500 |

|   |             |            |             |
|---|-------------|------------|-------------|
| C | -3.64304200 | 5.01420700 | 2.44115500  |
| C | 1.68278200  | 5.21485600 | 1.22195900  |
| C | 1.72736700  | 5.92215400 | -0.86344800 |
| C | 0.03831800  | 6.89038400 | -2.41686500 |
| C | -2.11064900 | 7.35595000 | -2.26456700 |
| C | -3.91214100 | 6.83603000 | -0.61512900 |
| C | -4.01042500 | 5.69001300 | 1.26406700  |
| C | -2.31545800 | 4.77230800 | 2.84169200  |
| C | -0.11339000 | 4.73110600 | 2.88342900  |
| C | 3.07328200  | 5.25884800 | 0.82288600  |
| H | 3.91403200  | 5.01318000 | 1.45587700  |
| C | 3.10037600  | 5.69200900 | -0.46725000 |
| H | 3.96703300  | 5.87368400 | -1.08642600 |
| C | -0.30965800 | 7.65662000 | -3.59299400 |
| H | 0.37390200  | 7.94283600 | -4.37872600 |
| C | -1.62736600 | 7.97160300 | -3.48322100 |
| H | -2.21607500 | 8.57393600 | -4.15870400 |
| C | -5.29972400 | 6.82343700 | -0.19697500 |
| H | -6.11726500 | 7.29280700 | -0.72403500 |
| C | -5.36079400 | 6.10596900 | 0.95640900  |
| H | -6.23231400 | 5.89117800 | 1.55808700  |
| C | -1.92987600 | 4.25161500 | 4.13506800  |
| H | -2.61210400 | 3.96287300 | 4.92172800  |
| C | -0.56689700 | 4.24744900 | 4.16981600  |
| H | 0.07515300  | 3.96256400 | 4.99263700  |
| C | 2.29071400  | 4.33347900 | 3.45445800  |

|   |             |             |             |
|---|-------------|-------------|-------------|
| C | 3.04983700  | 5.21346400  | 4.23145500  |
| H | 2.82132500  | 6.27480000  | 4.19329900  |
| C | 4.10342800  | 4.74662100  | 5.02077200  |
| H | 4.68694500  | 5.44594800  | 5.61288200  |
| C | 4.41164400  | 3.38595100  | 5.03448000  |
| H | 5.23888000  | 3.01820100  | 5.63481700  |
| C | 3.65631400  | 2.48119300  | 4.28755800  |
| H | 3.88712500  | 1.42346400  | 4.29656200  |
| C | 2.59561000  | 2.95529400  | 3.51234400  |
| C | 2.43415900  | 6.75660500  | -3.09413300 |
| C | 3.02919100  | 5.70654100  | -3.80953800 |
| H | 2.69087000  | 4.68764600  | -3.64365200 |
| C | 4.04705000  | 5.95761700  | -4.73129800 |
| H | 4.49247700  | 5.13051300  | -5.27790700 |
| C | 4.48824500  | 7.26321800  | -4.95228200 |
| H | 5.28056500  | 7.45880400  | -5.66995600 |
| C | 3.90698700  | 8.31642400  | -4.24354400 |
| H | 4.24820400  | 9.33594300  | -4.40358800 |
| C | 2.88991100  | 8.06476600  | -3.32193000 |
| H | 2.44489700  | 8.88512700  | -2.76557700 |
| C | -4.41104300 | 8.25029600  | -2.60183700 |
| C | -5.01721800 | 9.38966000  | -2.04595900 |
| H | -4.76499100 | 9.67952600  | -1.02997200 |
| C | -5.92343700 | 10.15230200 | -2.78298900 |
| H | -6.37558700 | 11.03238300 | -2.33315000 |
| C | -6.24309300 | 9.79282100  | -4.09359500 |

|    |             |             |             |
|----|-------------|-------------|-------------|
| H  | -6.94933100 | 10.38652900 | -4.66765600 |
| C  | -5.64626700 | 8.66634500  | -4.66180300 |
| H  | -5.88767600 | 8.37586500  | -5.68095200 |
| C  | -4.73853300 | 7.90504500  | -3.92414600 |
| H  | -4.27621900 | 7.03139300  | -4.37481500 |
| C  | -4.74184500 | 4.56158900  | 3.35744400  |
| C  | -5.05924000 | 5.27639600  | 4.52201200  |
| H  | -4.50522300 | 6.18128100  | 4.75692700  |
| C  | -6.07726600 | 4.83875500  | 5.37119300  |
| H  | -6.31168100 | 5.40674400  | 6.26783400  |
| C  | -6.79243500 | 3.67810300  | 5.07009400  |
| H  | -7.58262700 | 3.33562600  | 5.73287100  |
| C  | -6.48703900 | 2.95963300  | 3.91279700  |
| H  | -7.03315100 | 2.05166100  | 3.67134000  |
| C  | -5.47213800 | 3.40018900  | 3.06147900  |
| H  | -5.24027600 | 2.83863000  | 2.16015500  |
| Zn | 6.26579200  | -2.06865900 | 0.53139000  |
| N  | 5.88507900  | -3.23459200 | -1.15816700 |
| N  | 8.16327700  | -1.72115100 | -0.22223000 |
| N  | 6.98851700  | -1.58457100 | 2.42434600  |
| N  | 4.67817500  | -3.04387000 | 1.47246300  |
| C  | 3.72208300  | -4.23275300 | -0.48147600 |
| C  | 7.87754100  | -2.64480200 | -2.50557400 |
| C  | 9.18263700  | -0.64468100 | 1.76556300  |
| C  | 5.02453800  | -2.23049600 | 3.78646700  |
| C  | 4.72823600  | -3.92688500 | -1.41910600 |

|   |             |             |             |
|---|-------------|-------------|-------------|
| C | 6.60069200  | -3.21166500 | -2.33232700 |
| C | 8.60751600  | -1.98773400 | -1.49401000 |
| C | 9.19344300  | -1.08436200 | 0.42741500  |
| C | 8.13619400  | -0.87546300 | 2.68052500  |
| C | 6.26433300  | -1.59061300 | 3.59044900  |
| C | 4.32176000  | -2.93991800 | 2.79532500  |
| C | 3.74014400  | -3.84905300 | 0.87553600  |
| C | 4.69480600  | -4.32280200 | -2.81165800 |
| H | 3.89648000  | -4.87411500 | -3.28766600 |
| C | 5.84991500  | -3.87744200 | -3.37651200 |
| H | 6.16885000  | -3.99011100 | -4.40246500 |
| C | 9.96848600  | -1.52037400 | -1.64627700 |
| H | 10.57179400 | -1.63086500 | -2.53555300 |
| C | 10.33019400 | -0.96207600 | -0.46013100 |
| H | 11.28549400 | -0.53173100 | -0.19717500 |
| C | 8.12288900  | -0.39597000 | 4.04623200  |
| H | 8.89435600  | 0.20300200  | 4.50770000  |
| C | 6.96631500  | -0.83859300 | 4.60886500  |
| H | 6.61702100  | -0.67189800 | 5.61751700  |
| C | 3.12209900  | -3.71244500 | 3.04124500  |
| H | 2.64337400  | -3.83343300 | 4.00229700  |
| C | 2.76293700  | -4.27555600 | 1.85522700  |
| H | 1.93563200  | -4.94457600 | 1.66326900  |
| C | 2.58871900  | -5.10627900 | -0.94089800 |
| C | 2.81944400  | -6.46759500 | -1.17595600 |
| H | 3.82364500  | -6.85119000 | -1.02117800 |

|   |             |             |             |
|---|-------------|-------------|-------------|
| C | 1.79682500  | -7.32320500 | -1.58406700 |
| H | 2.00345100  | -8.37629300 | -1.75240600 |
| C | 0.51261900  | -6.81368700 | -1.76744100 |
| H | -0.29957500 | -7.46166600 | -2.08462800 |
| C | 0.24743700  | -5.46240200 | -1.55161600 |
| H | -0.74673500 | -5.06884900 | -1.70305900 |
| C | 1.27874700  | -4.60658200 | -1.13676200 |
| C | 8.52081500  | -2.77075300 | -3.85311700 |
| C | 8.75084600  | -1.63605600 | -4.64730100 |
| H | 8.44962900  | -0.66031000 | -4.27633800 |
| C | 9.35079700  | -1.75017000 | -5.90190400 |
| H | 9.51484300  | -0.85970800 | -6.50327500 |
| C | 9.73462100  | -3.00245300 | -6.38497200 |
| H | 10.20272900 | -3.09196000 | -7.36167800 |
| C | 9.51444900  | -4.13894200 | -5.60466300 |
| H | 9.81570700  | -5.11761700 | -5.96922700 |
| C | 8.91294200  | -4.02384900 | -4.35076800 |
| H | 8.75053000  | -4.90906600 | -3.74224100 |
| C | 10.38472300 | 0.10286400  | 2.25584000  |
| C | 10.69820600 | 1.37220100  | 1.74421800  |
| H | 10.05175800 | 1.81316100  | 0.99051900  |
| C | 11.81837500 | 2.06995200  | 2.19728800  |
| H | 12.04013300 | 3.05382600  | 1.79193100  |
| C | 12.64862600 | 1.50921300  | 3.16950600  |
| H | 13.52207800 | 2.05145200  | 3.52184300  |
| C | 12.35008900 | 0.24672300  | 3.68540800  |



|   |             |             |             |
|---|-------------|-------------|-------------|
| H | 12.99377800 | -0.20106200 | 4.43816300  |
| C | 11.22843000 | -0.44924400 | 3.23315100  |
| H | 11.00312100 | -1.43488600 | 3.63056200  |
| C | 4.40798000  | -2.15598300 | 5.14927400  |
| C | 3.21974700  | -1.43496100 | 5.35162300  |
| H | 2.76570000  | -0.92765300 | 4.50532400  |
| C | 2.63839600  | -1.35514600 | 6.61821300  |
| H | 1.72424600  | -0.78347000 | 6.75719400  |
| C | 3.23228200  | -2.00063300 | 7.70467300  |
| H | 2.77959700  | -1.94053600 | 8.69078600  |
| C | 4.41206200  | -2.72274500 | 7.51596600  |
| H | 4.87905600  | -3.23246800 | 8.35476400  |
| C | 4.99533700  | -2.79859200 | 6.25003200  |
| H | 5.91063200  | -3.36589600 | 6.10594100  |
| O | 5.06739100  | -0.28278400 | 0.12679100  |
| H | 4.35012500  | -0.18855100 | 0.79442200  |
| C | 3.91193200  | 0.78436700  | -1.74604300 |
| C | 3.76057400  | -0.36986800 | -2.52814300 |
| H | 4.43492100  | -1.20843400 | -2.38384000 |
| C | 2.75176600  | -0.44609700 | -3.48867500 |
| H | 2.65122600  | -1.34662700 | -4.08925800 |
| C | 1.87760300  | 0.62788000  | -3.67947900 |
| H | 1.08972100  | 0.56606700  | -4.42569300 |
| C | 2.02023800  | 1.77883900  | -2.90327600 |
| H | 1.33505800  | 2.61339300  | -3.03004100 |
| C | 3.03319300  | 1.85501400  | -1.94292700 |

|    |             |             |             |
|----|-------------|-------------|-------------|
| H  | 3.13428200  | 2.75413300  | -1.33816400 |
| C  | 5.03241500  | 0.88609900  | -0.72215200 |
| H  | 4.84033300  | 1.75313000  | -0.07741000 |
| C  | 6.40061900  | 1.05229300  | -1.37605200 |
| H  | 7.18122000  | 1.14428100  | -0.61520300 |
| H  | 6.40400500  | 1.95180600  | -2.00068500 |
| H  | 6.63464000  | 0.19238600  | -2.01089000 |
| Zn | -5.29084300 | -3.23941700 | -0.79569200 |
| N  | -4.84342400 | -5.00232300 | -1.81264000 |
| N  | -6.52196000 | -4.34745200 | 0.46254000  |
| N  | -6.37033200 | -1.54173500 | -0.23437400 |
| N  | -4.60660800 | -2.19152000 | -2.45146400 |
| C  | -5.36475100 | 0.07877500  | -1.81147400 |
| C  | -7.69810400 | -2.49703200 | 1.62359500  |
| C  | -5.85605000 | -6.63026800 | -0.24331200 |
| C  | -3.56291800 | -4.05091500 | -3.70890300 |
| C  | -6.13951300 | -0.26789000 | -0.68683100 |
| C  | -7.19679800 | -1.42776200 | 0.85659300  |
| C  | -7.40080500 | -3.85696500 | 1.39864200  |
| C  | -6.57124400 | -5.71791300 | 0.55846000  |
| C  | -5.04080700 | -6.27580300 | -1.33751300 |
| C  | -4.01102500 | -5.11368700 | -2.89894400 |
| C  | -3.87662000 | -2.69532300 | -3.49962400 |
| C  | -4.69128700 | -0.83602500 | -2.64618200 |
| C  | -6.82875600 | 0.68787400  | 0.15589500  |
| H  | -6.82232700 | 1.76064000  | 0.02400200  |

|   |             |             |             |
|---|-------------|-------------|-------------|
| C | -7.48166400 | -0.02970800 | 1.11063300  |
| H | -8.10667400 | 0.34727900  | 1.90725400  |
| C | -8.02953500 | -4.95423400 | 2.10185900  |
| H | -8.78420300 | -4.85479600 | 2.86839500  |
| C | -7.51760800 | -6.10278800 | 1.58323800  |
| H | -7.77595000 | -7.11819500 | 1.84616900  |
| C | -4.28553300 | -7.21927300 | -2.13476200 |
| H | -4.24606700 | -8.28656900 | -1.97243000 |
| C | -3.65046600 | -6.50137800 | -3.10068800 |
| H | -2.99840900 | -6.87201000 | -3.87840400 |
| C | -3.49551800 | -1.61980900 | -4.39158500 |
| H | -2.94244900 | -1.73758500 | -5.31212500 |
| C | -3.99568400 | -0.46968100 | -3.86312000 |
| H | -3.93149400 | 0.52935800  | -4.27148200 |
| C | -5.30853300 | 1.53219200  | -2.18668100 |
| C | -6.41484500 | 2.12604500  | -2.80368200 |
| H | -7.28694200 | 1.50871400  | -2.99857600 |
| C | -6.40977200 | 3.47204800  | -3.16476800 |
| H | -7.28129100 | 3.91261900  | -3.64050500 |
| C | -5.27823700 | 4.24345700  | -2.90779800 |
| H | -5.26530900 | 5.29496900  | -3.17222000 |
| C | -4.15611800 | 3.68430900  | -2.29847600 |
| H | -3.28439700 | 4.28792600  | -2.09412600 |
| C | -4.16730200 | 2.33237300  | -1.93418100 |
| C | -8.63678300 | -2.16976600 | 2.74429000  |
| C | -9.90674600 | -1.62961100 | 2.48437100  |

|   |              |              |             |
|---|--------------|--------------|-------------|
| H | -10.20740600 | -1.45751700  | 1.45467700  |
| C | -10.78207300 | -1.32545000  | 3.52765900  |
| H | -11.76296100 | -0.91372800  | 3.30445800  |
| C | -10.40329200 | -1.55532700  | 4.85166600  |
| H | -11.08485700 | -1.31892900  | 5.66450200  |
| C | -9.14390800  | -2.09262200  | 5.12448700  |
| H | -8.83808100  | -2.27193500  | 6.15201500  |
| C | -8.27002600  | -2.39800100  | 4.08020600  |
| H | -7.28867400  | -2.81092600  | 4.29694200  |
| C | -6.00243300  | -8.08782200  | 0.07074300  |
| C | -5.51021600  | -8.61929500  | 1.27339600  |
| H | -5.01017600  | -7.96046800  | 1.97795100  |
| C | -5.64895400  | -9.97665800  | 1.56590000  |
| H | -5.25544500  | -10.36906200 | 2.50006400  |
| C | -6.28609400  | -10.82804900 | 0.66141000  |
| H | -6.39533400  | -11.88505000 | 0.88916600  |
| C | -6.78314400  | -10.31243300 | -0.53705500 |
| H | -7.28667800  | -10.96587500 | -1.24481800 |
| C | -6.64195800  | -8.95553100  | -0.82943400 |
| H | -7.03694200  | -8.55552400  | -1.75903100 |
| C | -2.69636800  | -4.38614100  | -4.88425100 |
| C | -3.21267300  | -5.08810400  | -5.98488400 |
| H | -4.25726800  | -5.38690100  | -5.97952600 |
| C | -2.40380100  | -5.39256900  | -7.08055000 |
| H | -2.82323800  | -5.93155100  | -7.92617700 |
| C | -1.06333400  | -5.00214800  | -7.09378000 |

|   |             |             |             |
|---|-------------|-------------|-------------|
| H | -0.43315400 | -5.23979600 | -7.94673600 |
| C | -0.53746800 | -4.30529900 | -6.00434800 |
| H | 0.50680700  | -4.00356800 | -6.00297100 |
| C | -1.34722600 | -3.99897000 | -4.90988200 |
| H | -0.93681400 | -3.46608900 | -4.05720700 |
| O | -3.57071100 | -2.88126500 | 0.43337000  |
| H | -2.70647900 | -2.87629700 | -0.04406600 |
| C | -2.64999700 | -2.23504300 | 2.58666600  |
| C | -1.44163000 | -2.46121900 | 3.25416800  |
| H | -0.97993200 | -3.44343700 | 3.23204800  |
| C | -0.81234300 | -1.43259700 | 3.96281000  |
| H | 0.12349700  | -1.63328500 | 4.47840900  |
| C | -1.38424100 | -0.16219100 | 4.01027100  |
| H | -0.89867200 | 0.64011900  | 4.56004400  |
| C | -2.59284000 | 0.07628700  | 3.34785300  |
| H | -3.04903700 | 1.06231900  | 3.38645300  |
| C | -3.21793500 | -0.95177100 | 2.64582900  |
| H | -4.15807100 | -0.76513200 | 2.13289500  |
| C | -3.38596600 | -3.31616500 | 1.80277000  |
| H | -4.40957100 | -3.37896400 | 2.18570300  |
| C | -2.76672100 | -4.71047900 | 1.83747300  |
| H | -3.39668700 | -5.39813700 | 1.26674200  |
| H | -2.69106800 | -5.08226000 | 2.86517100  |
| H | -1.76685600 | -4.71765200 | 1.38987100  |
| N | 1.75759400  | 2.09591300  | 2.75537000  |
| N | 1.07217000  | -3.22183500 | -0.90684200 |

|   |             |             |             |
|---|-------------|-------------|-------------|
| N | -3.05813000 | 1.69149400  | -1.32975000 |
| O | 3.20273100  | 0.48239400  | 2.02009500  |
| O | -1.21086500 | -3.04128600 | -0.98873800 |
| O | -1.59741900 | 3.39727600  | -0.82513600 |
| C | 1.04095900  | 0.64550900  | 0.98099200  |
| C | 0.10491600  | 1.55578000  | 0.48068400  |
| H | 0.14067300  | 2.60797000  | 0.73982300  |
| C | -0.89904300 | 1.14214700  | -0.40069300 |
| C | -0.93205300 | -0.19655800 | -0.80870200 |
| H | -1.67036400 | -0.56221700 | -1.51571600 |
| C | 0.02736200  | -1.10740200 | -0.34497500 |
| C | 1.00926300  | -0.68461800 | 0.55326200  |
| H | 1.73243800  | -1.38007200 | 0.96770700  |
| C | 2.10789800  | 1.05584700  | 1.95405200  |
| C | -1.87871900 | 2.18852800  | -0.87193500 |
| C | -0.09564900 | -2.53995800 | -0.77536400 |
| H | 1.92660300  | -2.69209400 | -0.77492100 |
| H | -3.20465400 | 0.69805600  | -1.19412800 |
| H | 0.82007500  | 2.45367900  | 2.62761400  |

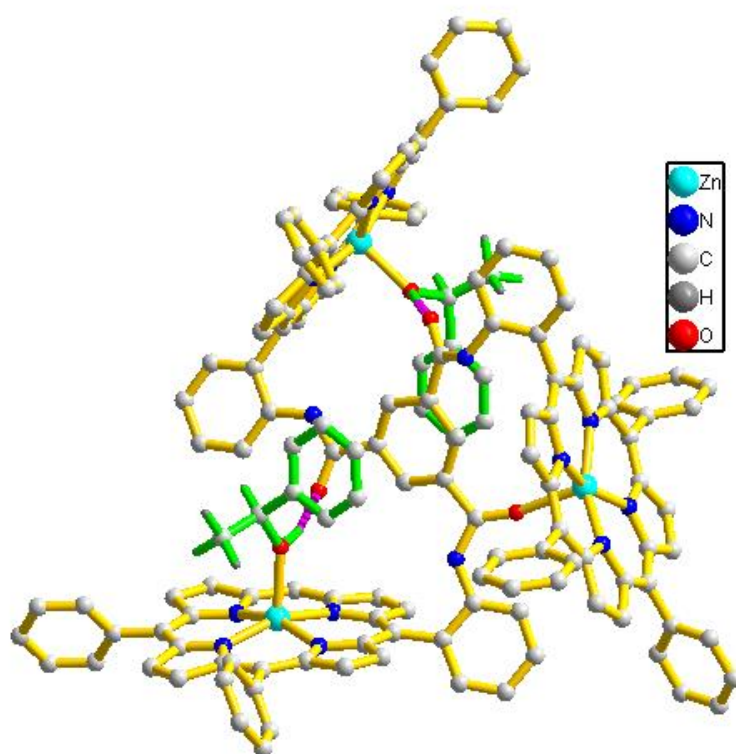

Conformer B2

$$\Delta E^{\theta} = -12582.37319630 \text{ hartree}$$

Cartesian coordinates for Geometry Optimized Conformer B2

| Atoms | x           | y          | z           |
|-------|-------------|------------|-------------|
| Zn    | 0.50778900  | 5.71979600 | -0.21345100 |
| N     | 0.38654500  | 5.56030400 | 1.85599700  |
| N     | 2.29747600  | 6.73825700 | 0.04645800  |
| N     | 0.39063400  | 6.52534600 | -2.11765000 |
| N     | -1.54969900 | 5.42281200 | -0.28663600 |
| C     | -1.99397300 | 4.92457000 | 2.09887300  |
| C     | -1.92612900 | 5.86349100 | -2.69650300 |
| C     | 2.63081600  | 7.57485200 | -2.26385000 |
| C     | 2.71192200  | 6.19198700 | 2.42772100  |

|   |             |            |             |
|---|-------------|------------|-------------|
| C | -0.70181500 | 5.16528000 | 2.59815600  |
| C | 1.42866900  | 5.70351000 | 2.73990800  |
| C | 3.09079700  | 6.69561400 | 1.16942200  |
| C | 3.04096200  | 7.35074700 | -0.93396200 |
| C | 1.39123700  | 7.17478600 | -2.80006200 |
| C | -0.65647900 | 6.38885100 | -2.99832800 |
| C | -2.33313000 | 5.44370600 | -1.41641800 |
| C | -2.37264700 | 5.04877300 | 0.74943200  |
| C | -0.33041000 | 5.04148300 | 3.99082000  |
| H | -1.00205500 | 4.77387300 | 4.79526100  |
| C | 0.98862000  | 5.36932700 | 4.07708500  |
| H | 1.60097400  | 5.41735200 | 4.96592700  |
| C | 4.38220300  | 7.27963000 | 0.88001000  |
| H | 5.20354600  | 7.35974500 | 1.57687300  |
| C | 4.34717200  | 7.69633500 | -0.41369200 |
| H | 5.13546700  | 8.18025800 | -0.97151000 |
| C | 0.96528700  | 7.44151600 | -4.15794100 |
| H | 1.54687400  | 7.95820300 | -4.90693600 |
| C | -0.29084400 | 6.93856300 | -4.28552600 |
| H | -0.92416400 | 6.95694600 | -5.16029300 |
| C | -3.68684200 | 5.05562300 | -1.08337800 |
| H | -4.51165100 | 5.01002300 | -1.77972800 |
| C | -3.71161100 | 4.81125000 | 0.25571000  |
| H | -4.55996400 | 4.52572000 | 0.86138000  |
| C | -3.04276700 | 4.41365900 | 3.04824900  |
| C | -3.96360400 | 5.26352300 | 3.66968200  |



|   |             |             |             |
|---|-------------|-------------|-------------|
| H | -3.87745000 | 6.33475300  | 3.51114100  |
| C | -4.99575300 | 4.74713900  | 4.45611700  |
| H | -5.70737500 | 5.42143800  | 4.92433300  |
| C | -5.11939500 | 3.36759500  | 4.62628900  |
| H | -5.92977000 | 2.95947900  | 5.22338500  |
| C | -4.19891300 | 2.49913600  | 4.03912800  |
| H | -4.28368000 | 1.42722500  | 4.17149500  |
| C | -3.16323600 | 3.02527500  | 3.26528900  |
| C | -2.95195700 | 5.83816500  | -3.79221200 |
| C | -3.36319900 | 4.62890900  | -4.37230100 |
| H | -2.92471600 | 3.69524100  | -4.03295400 |
| C | -4.32589100 | 4.61355000  | -5.38331800 |
| H | -4.62743600 | 3.66611800  | -5.82236100 |
| C | -4.89468100 | 5.80693500  | -5.83065200 |
| H | -5.64402300 | 5.79466900  | -6.61772100 |
| C | -4.49548600 | 7.01696900  | -5.25970800 |
| H | -4.93594300 | 7.95156900  | -5.59733500 |
| C | -3.53328700 | 7.03178200  | -4.24933700 |
| H | -3.22931100 | 7.97404300  | -3.80178700 |
| C | 3.57569800  | 8.30538300  | -3.16936900 |
| C | 3.90557500  | 9.64819400  | -2.92354700 |
| H | 3.46243900  | 10.15408400 | -2.07035000 |
| C | 4.78179600  | 10.33535900 | -3.76422700 |
| H | 5.01946400  | 11.37582500 | -3.55843300 |
| C | 5.34555900  | 9.69324700  | -4.86843800 |
| H | 6.02793900  | 10.22859200 | -5.52315800 |

|    |             |             |             |
|----|-------------|-------------|-------------|
| C  | 5.02539400  | 8.35929300  | -5.12616800 |
| H  | 5.46017600  | 7.84878700  | -5.98155300 |
| C  | 4.14768000  | 7.67276100  | -4.28548900 |
| H  | 3.90421300  | 6.63365100  | -4.48829000 |
| C  | 3.72455000  | 6.22219000  | 3.53229900  |
| C  | 4.14569400  | 7.43623800  | 4.09734900  |
| H  | 3.72534000  | 8.36696300  | 3.72655500  |
| C  | 5.08547900  | 7.45577800  | 5.12878900  |
| H  | 5.39592100  | 8.40573300  | 5.55612300  |
| C  | 5.62038400  | 6.26104700  | 5.61431000  |
| H  | 6.35260000  | 6.27626300  | 6.41718100  |
| C  | 5.20814700  | 5.04662200  | 5.06292700  |
| H  | 5.62151600  | 4.11154100  | 5.43186000  |
| C  | 4.26755300  | 5.02844800  | 4.03221900  |
| H  | 3.95259300  | 4.08266000  | 3.59948200  |
| Zn | -5.89670500 | -2.58009700 | 0.72449800  |
| N  | -5.44761700 | -3.92397400 | -0.81263400 |
| N  | -7.78877700 | -2.37604500 | -0.11082400 |
| N  | -6.67691700 | -1.88823500 | 2.52463100  |
| N  | -4.29839600 | -3.36371700 | 1.79762700  |
| C  | -3.20887500 | -4.63198800 | -0.03035300 |
| C  | -7.44831300 | -3.60771200 | -2.23679800 |
| C  | -8.87452200 | -1.08854000 | 1.71062100  |
| C  | -4.74004200 | -2.33427700 | 4.00284900  |
| C  | -4.22964700 | -4.52741400 | -0.99658100 |
| C  | -6.14638300 | -4.08351000 | -1.98412300 |

|   |              |             |             |
|---|--------------|-------------|-------------|
| C | -8.21161400  | -2.83914500 | -1.33360400 |
| C | -8.84772700  | -1.69342700 | 0.43779500  |
| C | -7.84807600  | -1.18615200 | 2.67118400  |
| C | -5.99073500  | -1.75767200 | 3.70624100  |
| C | -3.97805700  | -3.10694200 | 3.10759300  |
| C | -3.28665700  | -4.13667200 | 1.28774500  |
| C | -4.14529300  | -5.06844200 | -2.33776500 |
| H | -3.29439500  | -5.59036300 | -2.75162700 |
| C | -5.33220400  | -4.79873700 | -2.94657600 |
| H | -5.62943700  | -5.05203900 | -3.95387200 |
| C | -9.58718200  | -2.44776400 | -1.55603600 |
| H | -10.17958000 | -2.70833000 | -2.42095000 |
| C | -9.97797500  | -1.73587000 | -0.46507300 |
| H | -10.94968000 | -1.30575100 | -0.27076200 |
| C | -7.88863200  | -0.56826500 | 3.97977500  |
| H | -8.68764500  | 0.05514000  | 4.35369200  |
| C | -6.74363400  | -0.92636500 | 4.62157500  |
| H | -6.43463100  | -0.65569900 | 5.62102500  |
| C | -2.73102100  | -3.76324800 | 3.44317500  |
| H | -2.26761400  | -3.76338400 | 4.41945100  |
| C | -2.29932000  | -4.39350000 | 2.31601800  |
| H | -1.41823400  | -5.00881000 | 2.19585900  |
| C | -1.95769900  | -5.36281200 | -0.42472600 |
| C | -0.74894100  | -4.67519200 | -0.69635700 |
| C | 0.39686100   | -5.38879500 | -1.08122200 |
| H | 1.30912000   | -4.85711300 | -1.30591500 |

|   |              |             |             |
|---|--------------|-------------|-------------|
| C | 0.34854800   | -6.77835000 | -1.18392300 |
| H | 1.24766300   | -7.30995000 | -1.48279200 |
| C | -0.83045900  | -7.47043700 | -0.91407600 |
| H | -0.86705900  | -8.55328400 | -0.99242900 |
| C | -1.96992600  | -6.75763500 | -0.54144600 |
| H | -2.89715100  | -7.28140900 | -0.32776700 |
| C | -8.07111400  | -3.95281500 | -3.55428300 |
| C | -8.37790600  | -2.95356100 | -4.49205800 |
| H | -8.15142100  | -1.91762100 | -4.25527900 |
| C | -8.95793800  | -3.27704200 | -5.71918300 |
| H | -9.18240100  | -2.48867100 | -6.43302900 |
| C | -9.24391400  | -4.60733400 | -6.03156100 |
| H | -9.69642200  | -4.85970800 | -6.98685900 |
| C | -8.94515800  | -5.61118100 | -5.10839400 |
| H | -9.16930500  | -6.64929100 | -5.33976700 |
| C | -8.36401500  | -5.28666100 | -3.88213300 |
| H | -8.14058100  | -6.06906900 | -3.16233800 |
| C | -10.10522300 | -0.31832100 | 2.08012200  |
| C | -10.96208200 | -0.76911800 | 3.09724900  |
| H | -10.72626500 | -1.69384000 | 3.61640100  |
| C | -12.11034200 | -0.05184200 | 3.43509500  |
| H | -12.76372000 | -0.42130600 | 4.22127700  |
| C | -12.42320600 | 1.13072700  | 2.76218700  |
| H | -13.31743000 | 1.68950800  | 3.02529900  |
| C | -11.58106700 | 1.58957100  | 1.74774400  |
| H | -11.81444400 | 2.51062200  | 1.21982100  |

|   |              |             |             |
|---|--------------|-------------|-------------|
| C | -10.43414000 | 0.87045100  | 1.40937700  |
| H | -9.77886200  | 1.23283900  | 0.62207000  |
| C | -4.17512600  | -2.10417500 | 5.37163200  |
| C | -3.05680100  | -1.27445800 | 5.55196900  |
| H | -2.61479900  | -0.79193100 | 4.68449300  |
| C | -2.52534200  | -1.05611600 | 6.82421900  |
| H | -1.66330700  | -0.40495200 | 6.94464800  |
| C | -3.10256500  | -1.66672600 | 7.93926900  |
| H | -2.68868200  | -1.49886100 | 8.92994600  |
| C | -4.21583300  | -2.49267400 | 7.77361400  |
| H | -4.67026400  | -2.97421100 | 8.63561300  |
| C | -4.74804500  | -2.70809600 | 6.50124000  |
| H | -5.61172500  | -3.35495000 | 6.37464200  |
| O | -4.80575000  | -0.93646200 | -0.09432000 |
| H | -4.27596300  | -0.38770000 | 0.53348800  |
| C | -3.88407200  | -0.03318100 | -2.15381000 |
| C | -3.47558300  | -1.12645400 | -2.93298800 |
| H | -4.07052900  | -2.03651400 | -2.92998100 |
| C | -2.32094100  | -1.05903000 | -3.71213100 |
| H | -2.02632700  | -1.91473900 | -4.31452800 |
| C | -1.55105800  | 0.10656600  | -3.72414400 |
| H | -0.65076800  | 0.16199800  | -4.33043500 |
| C | -1.94793600  | 1.20046600  | -2.95381000 |
| H | -1.35341100  | 2.11048300  | -2.95105800 |
| C | -3.10838300  | 1.13253700  | -2.17702800 |
| H | -3.40250600  | 1.99981800  | -1.59314200 |

|    |             |             |             |
|----|-------------|-------------|-------------|
| C  | -5.12976100 | -0.18212500 | -1.28934200 |
| H  | -5.83158400 | -0.83295800 | -1.81856200 |
| C  | -5.84368300 | 1.11520300  | -0.91907300 |
| H  | -6.76165200 | 0.88046700  | -0.37228000 |
| H  | -6.10559400 | 1.68517700  | -1.81719700 |
| H  | -5.22291300 | 1.74931700  | -0.27732600 |
| Zn | 5.59708900  | -3.00729800 | -0.62335000 |
| N  | 4.75239700  | -1.86905600 | -2.15411700 |
| N  | 5.26477400  | -4.69617700 | -1.79606200 |
| N  | 6.98267900  | -4.09621600 | 0.45982400  |
| N  | 6.50679400  | -1.26943500 | 0.07544500  |
| C  | 5.38262100  | 0.39749500  | -1.37075600 |
| C  | 3.81197900  | -3.69812700 | -3.53585900 |
| C  | 6.50005000  | -6.35697700 | -0.43704500 |
| C  | 7.97128400  | -2.26353400 | 1.80621600  |
| C  | 4.75851600  | -0.49996600 | -2.26200600 |
| C  | 4.03809500  | -2.34399100 | -3.22747900 |
| C  | 4.37941200  | -4.78545700 | -2.84169300 |
| C  | 5.59409300  | -5.98339100 | -1.45003700 |
| C  | 7.16867000  | -5.45748100 | 0.41650800  |
| C  | 7.82836200  | -3.61481800 | 1.42859800  |
| C  | 7.33500700  | -1.18127000 | 1.16939100  |
| C  | 6.17176500  | 0.01697600  | -0.26640300 |
| C  | 4.03215800  | -0.09712700 | -3.44851100 |
| H  | 3.91215700  | 0.92014900  | -3.79441100 |
| C  | 3.58268900  | -1.23684300 | -4.04127900 |

|   |            |             |             |
|---|------------|-------------|-------------|
| H | 3.02371700 | -1.32678000 | -4.96141700 |
| C | 4.11880800 | -6.17655900 | -3.14685700 |
| H | 3.45103400 | -6.53432200 | -3.91714900 |
| C | 4.87035600 | -6.91696400 | -2.28674900 |
| H | 4.92997800 | -7.99363800 | -2.22100300 |
| C | 8.18353700 | -5.84219100 | 1.37374100  |
| H | 8.55112000 | -6.84658700 | 1.52556200  |
| C | 8.59004900 | -4.70477300 | 1.99928400  |
| H | 9.35185200 | -4.60470400 | 2.75867000  |
| C | 7.48789100 | 0.20611800  | 1.55667100  |
| H | 8.06832500 | 0.56216300  | 2.39535200  |
| C | 6.77578000 | 0.94704800  | 0.66504000  |
| H | 6.66840800 | 2.02206600  | 0.63582000  |
| C | 5.30441900 | 1.86630600  | -1.68242700 |
| C | 4.13316000 | 2.63923800  | -1.48788500 |
| C | 4.12519500 | 4.00518900  | -1.79818500 |
| H | 3.22998800 | 4.58601600  | -1.63560100 |
| C | 5.27714700 | 4.60765800  | -2.30078100 |
| H | 5.25827700 | 5.66789100  | -2.52948400 |
| C | 6.43906400 | 3.86472400  | -2.49991000 |
| H | 7.33552000 | 4.33588200  | -2.89288000 |
| C | 6.44218000 | 2.50645000  | -2.18939900 |
| H | 7.33858500 | 1.91264300  | -2.34170400 |
| C | 2.91843400 | -4.00124500 | -4.69926400 |
| C | 1.54822900 | -3.69992300 | -4.64193000 |
| H | 1.14488800 | -3.25821700 | -3.73551200 |

|   |             |              |             |
|---|-------------|--------------|-------------|
| C | 0.71218800  | -3.97839700  | -5.72401700 |
| H | -0.34843200 | -3.74795200  | -5.65902800 |
| C | 1.23097100  | -4.55829400  | -6.88321000 |
| H | 0.57941500  | -4.77352900  | -7.72600800 |
| C | 2.59217500  | -4.86088600  | -6.95261000 |
| H | 3.00645400  | -5.30788900  | -7.85265000 |
| C | 3.42800200  | -4.58591600  | -5.86951100 |
| H | 4.48824600  | -4.81585100  | -5.92843800 |
| C | 6.78600000  | -7.81728700  | -0.26420900 |
| C | 6.39947000  | -8.49191000  | 0.90497700  |
| H | 5.88114700  | -7.94262000  | 1.68604300  |
| C | 6.66513100  | -9.85199000  | 1.06775900  |
| H | 6.35237600  | -10.35650700 | 1.97833600  |
| C | 7.32560900  | -10.56303000 | 0.06420400  |
| H | 7.53397200  | -11.62209700 | 0.19084900  |
| C | 7.71775400  | -9.90443600  | -1.10268000 |
| H | 8.23802200  | -10.44789300 | -1.88718000 |
| C | 7.44951400  | -8.54476100  | -1.26541200 |
| H | 7.76291100  | -8.03335100  | -2.17123100 |
| C | 8.89386500  | -1.95803100  | 2.94658700  |
| C | 8.58485100  | -2.37260500  | 4.25195200  |
| H | 7.66088500  | -2.91576100  | 4.43024400  |
| C | 9.44267400  | -2.08821200  | 5.31519100  |
| H | 9.18187500  | -2.41347000  | 6.31904100  |
| C | 10.62838800 | -1.38594600  | 5.09199300  |
| H | 11.29740400 | -1.16528200  | 5.91953900  |



|   |             |             |             |
|---|-------------|-------------|-------------|
| C | 10.95004900 | -0.97081900 | 3.79841600  |
| H | 11.87417300 | -0.42937300 | 3.61319800  |
| C | 10.09044000 | -1.25400700 | 2.73630500  |
| H | 10.34727600 | -0.93669600 | 1.72953900  |
| O | 3.74134100  | -2.97683500 | 0.53610500  |
| H | 2.99483000  | -2.73730600 | -0.05810300 |
| C | 2.59385700  | -2.21163200 | 2.55209500  |
| C | 1.36284900  | -2.33432100 | 3.20505600  |
| H | 0.80410800  | -3.26517400 | 3.13155100  |
| C | 0.83845400  | -1.27323600 | 3.94670600  |
| H | -0.11656300 | -1.39126700 | 4.45195600  |
| C | 1.53954700  | -0.06982200 | 4.03316000  |
| H | 1.13416700  | 0.76031900  | 4.60622700  |
| C | 2.76605000  | 0.06422300  | 3.37615800  |
| H | 3.31787200  | 0.99894600  | 3.43831800  |
| C | 3.29157000  | -0.99894400 | 2.64207000  |
| H | 4.24492200  | -0.89199000 | 2.13256900  |
| C | 3.18387500  | -3.39416000 | 1.79927900  |
| H | 2.38167500  | -4.11483000 | 1.59030600  |
| C | 4.27616700  | -4.09529100 | 2.60167300  |
| H | 4.65629700  | -4.96511000 | 2.05864300  |
| H | 3.87114600  | -4.42584400 | 3.56374500  |
| H | 5.11064800  | -3.41413700 | 2.79447400  |
| N | -2.17271300 | 2.19596500  | 2.66622100  |
| N | -0.76234200 | -3.26276700 | -0.55875400 |
| N | 2.99516900  | 1.96577100  | -0.98123700 |

|   |             |             |             |
|---|-------------|-------------|-------------|
| O | -3.47021500 | 0.53386100  | 1.79479100  |
| O | 1.42694300  | -2.72041400 | -0.94035200 |
| O | 1.40549700  | 3.60944400  | -0.71728100 |
| C | -1.21885800 | 0.75410000  | 0.98548900  |
| C | -1.07106500 | -0.58516100 | 0.60703600  |
| H | -1.78244000 | -1.30837400 | 0.99294400  |
| C | -0.00453800 | -0.96823000 | -0.20978100 |
| C | 0.91795000  | -0.00337100 | -0.63881300 |
| H | 1.71812700  | -0.33761800 | -1.29137000 |
| C | 0.78280600  | 1.33657400  | -0.26326100 |
| C | -0.30395700 | 1.70965700  | 0.53340100  |
| H | -0.42321000 | 2.76253400  | 0.76369700  |
| C | -2.39154300 | 1.13754900  | 1.84019100  |
| C | 1.74825800  | 2.41665600  | -0.67990800 |
| C | 0.27889500  | -2.39133200 | -0.60251100 |
| H | -1.68017200 | -2.87697800 | -0.36819500 |
| H | 3.16488000  | 0.98244600  | -0.80619200 |
| H | -1.25606100 | 2.62098400  | 2.61311000  |
